# Supplementary material for: Climatic and community sociodemographic factors associated with remote Indigenous Australian smoking rates: an ecological study of health audit data
Source: PubMed Central journal article supplement — BMJ Open. 2019 Jul 9;9(7):e032173. doi: 10.1136/bmjopen-2019-032173 (PMC6624038; doi:10.1136/bmjopen-2019-032173), 2019-07-09
Supplement: bmjopen-2019-032173.draft_revisions.pdf [file bmjopen-2019-032173.draft_revisions.pdf]

# BMJ Open

BMJ Open is committed to open peer review. As part of this commitment we make the peer review history of every article we publish publicly available.

When an article is published we post the peer reviewers' comments and the authors' responses online. We also post the versions of the paper that were used during peer review. These are the versions that the peer review comments apply to.

The versions of the paper that follow are the versions that were submitted during the peer review process. They are not the versions of record or the final published versions. They should not be cited or distributed as the published version of this manuscript.

BMJ Open is an open access journal and the full, final, typeset and author-corrected version of record of the manuscript is available on our site with no access controls, subscription charges or pay-per-view fees (<http://bmjopen.bmj.com>).

If you have any questions on BMJ Open's open peer review process please email [info.bmjopen@bmj.com](mailto:info.bmjopen@bmj.com)

# BMJ Open

## **Climatic and community sociodemographic factors associated with remote Indigenous Australian smoking rates – an ecological study of health audit data**

|                               |                                                                                                                                                                                                                                                                                                                                                                                                                                              |
|-------------------------------|----------------------------------------------------------------------------------------------------------------------------------------------------------------------------------------------------------------------------------------------------------------------------------------------------------------------------------------------------------------------------------------------------------------------------------------------|
| Journal:                      | <i>BMJ Open</i>                                                                                                                                                                                                                                                                                                                                                                                                                              |
| Manuscript ID                 | bmjopen-2019-032173                                                                                                                                                                                                                                                                                                                                                                                                                          |
| Article Type:                 | Research                                                                                                                                                                                                                                                                                                                                                                                                                                     |
| Date Submitted by the Author: | 06-Jun-2019                                                                                                                                                                                                                                                                                                                                                                                                                                  |
| Complete List of Authors:     | Carroll, Suzanne; University of Canberra, Centre for Research and Action in Public Health, Health Research Institute<br>Dale, Michael; University of Canberra, Centre for Research and Action in Public Health, Health Research Institute<br>Baillie, Ross; The University of Sydney, University Centre for Rural Health<br>Daniel, Mark; University of Canberra, Centre for Research and Action in Public Health, Health Research Institute |
| Keywords:                     | EPIDEMIOLOGY, PUBLIC HEALTH, AUDIT                                                                                                                                                                                                                                                                                                                                                                                                           |
|                               |                                                                                                                                                                                                                                                                                                                                                                                                                                              |

SCHOLARONE™  
Manuscripts

1  
2  
3 **Climatic and community sociodemographic factors associated with remote Indigenous**  
4 **Australian smoking rates – an ecological study of health audit data**  
5  
6

7 **Authors:**  
8

9 Suzanne J Carroll<sup>a</sup>, Michael J Dale<sup>a</sup>, Ross Bailie<sup>b</sup>, Mark Daniel<sup>a, c \*</sup>  
10

11 <sup>a</sup> Centre for Research and Action in Public Health, Health Research Institute, University of  
12 Canberra, Canberra, Australia  
13

14 <sup>b</sup> University Centre for Rural Health, School of Rural Health, University of Sydney, Lismore,  
15 Australia  
16

17 <sup>c</sup> Department of Medicine, St. Vincent's Hospital, The University of Melbourne, Fitzroy,  
18 Australia  
19  
20  
21  
22  
23

24 \* Corresponding Author  
25

26 Professor Mark Daniel  
27

28  
29 Postal address: Room 22B35, Centre for Research and Action in Public Health, Health  
30 Research Institute, University of Canberra, Locked Bag 1 University of Canberra ACT 2601  
31 Australia.  
32

33  
34 Ph +61 2 6206 8532  
35

36 email [mark.daniel@canberra.edu.au](mailto:mark.daniel@canberra.edu.au)  
37

38 **Word Count:3718**  
39  
40  
41  
42  
43  
44  
45  
46  
47  
48  
49  
50  
51  
52  
53  
54  
55  
56  
57  
58  
59  
60

## ABSTRACT

Australian Indigenous smoking rates are highest in remote communities but likely vary between communities; few studies have assessed community features in relation to Indigenous smoking rates. **Design and Objective:** This ecological study evaluated the associations between smoking rates, and community sociodemographic and climatic characteristics for a large sample of remote Indigenous communities. **Setting and sample:** Records (n=2689) from an audit of community health centres in the Northern Territory and Queensland were used to estimate smoking rates dichotomised at the median for 70 predominantly Indigenous remote communities. Community characteristics were similarly dichotomised. **Methods:** Cross-tabulations were used to calculate the odds of a community classified as high for a sociodemographic or climatic factor also being high for smoking rate. Additional cross-tabulations, stratified by sociodemographic, region (coastal or central), and geographic connectivity levels, were performed to assess potential confounding. **Results:** Community smoking rates ranged from 25-96% (median 60.2%). Moderately strong relationships were observed between community smoking rate and population size (OR 6.25, [95% CI 2.18-17.95]), education level (OR 3.67 [1.35-10.01]), income (2.86 [1.07-7.67]), and heat (2.86 [1.07-7.67]). **Conclusions:** Smoking rates in Australian remote Indigenous communities are universally high. Smoking rates are associated with greater community-level socioeconomic status and size, most likely reflecting greater means of accessing tobacco with mass of smokers sufficient to sustain a normative influence. Severe heat was also associated with high smoking rates suggesting such a stressor might support smoking as a coping mechanism. Community sociodemographic and climatic factors bear consideration as context-level correlates of community smoking rates.

**Strengths and Limitations:**

This study contributes to the limited literature on smoking rates in remote Australian Indigenous communities which thus far has been based on considerably smaller samples of communities.

This study is unique in estimating ecological associations between smoking rates and relevant community-level sociodemographic, geographic and climatic factors.

Community smoking rates derived from health service data were linked with census, geographic connectivity, and climatic information.

Sample loss due to missing smoking information most likely indicates random deficiencies in health assessment at the local level, thus biasing results towards the null.

Study results are generalisable to Australian remote Indigenous communities and may be broadly generalisable to remote-dwelling indigenous populations in other developed countries.

## INTRODUCTION

Tobacco smoking is a major risk factor for a range of chronic health conditions including cardiovascular disease, type 2 diabetes and cancer<sup>1, 2</sup>. Indigenous populations worldwide have higher smoking rates than non-Indigenous populations. Disparities in smoking prevalence are apparent in New Zealand (Maori 35.5%; New Zealand adults 14.2%), the US (American Indians/Alaska Natives 29.2%; US adults 16.8%), and Canada (First Nations, off-reserve 26.8%; Inuit 48.9%; Canadian non-Aboriginal population 15.1%)<sup>3-5</sup>. In Australia, Aboriginal and Torres Strait Islander peoples (hereafter Indigenous Australians) are 2.7 times as likely to smoke daily as non-Indigenous Australians, with age-standardised prevalence rates of 42% and 15%, respectively<sup>6</sup>. Tobacco-related conditions are estimated to account for half of the health gap between Indigenous and non-Indigenous Australians<sup>7</sup>.

Greater smoking in Indigenous Australians has been attributed to socioeconomic factors (low income, financial stress, unemployment, low education, and housing [rental versus ownership, overcrowding]); sociocultural factors (smoking exposure and normalisation); social factors (boredom, or being: arrested; incarcerated; removed from family [or removal of a relative]; a victim of violence or threats); and stress, including stress associated with a history of colonisation and dispossession (racism, marginalisation, family dislocation, disconnection from the land, loss of traditional diet and lifestyle and the adoption of Western habits and practices)<sup>8-10</sup>.

Adult Indigenous Australian smoking rates vary from 39% in Major Cities to 49% in Remote and 56% in Very Remote areas<sup>11, 12</sup>. This is unsurprising given smoking varies by social disadvantage<sup>9</sup> and, in Australia, social inclusion and socioeconomic status (SES) lessen with

1  
2  
3 distance from major metropolitan areas<sup>13</sup>. Thus, it is reasonable to anticipate greater  
4  
5 smoking amongst Indigenous Australians in more remote regions.  
6  
7

8  
9 Smoking rates also differ between remote Indigenous communities with one study reporting  
10  
11 rates ranging from 59% to 80%<sup>14</sup>. This variation may be driven by community-specific  
12  
13 factors. In research not focused on Indigenous communities, factors such as neighbourhood  
14  
15 disadvantage, perceived crime and neighbourhood stress, and perceived acceptability of  
16  
17 smoking have been linked to greater likelihood of an individual smoking<sup>15-17</sup>. Thus, variation  
18  
19 in community exposures may shape differences in smoking behaviours between remote  
20  
21 Indigenous communities, yielding differences in consequent disease outcomes. Specific to  
22  
23 Indigenous smoking, geographic variation in smoking rates (i.e., generally higher smoking  
24  
25 rates in northern coastal regions) has been attributed to historical factors, with smoking  
26  
27 behaviour introduced across the northern coastal region of Australia by Macassan  
28  
29 fishermen<sup>10, 18</sup> beginning around 1780<sup>19</sup>. Minimal research has investigated differences  
30  
31 between Indigenous communities, despite geographic variations in smoking rates that likely  
32  
33 reflect geographic variation in environmental predisposing factors.  
34  
35  
36  
37  
38  
39

40  
41 A further potential influence on smoking prevalence is extreme weather, which is  
42  
43 demonstrably 'more extreme' in remote Australian regions. Temperature extremes can vary  
44  
45 from 34.8-38.0°C in the Darwin (metropolitan) region, to 42.0-46.3°C in the remote Rabbit  
46  
47 Flat region<sup>20</sup>. Cigarette sales across the US demonstrate seasonality, increasing in the  
48  
49 summer months<sup>21</sup>, with this pattern also evident within smaller geographic areas (i.e.  
50  
51 within New Jersey)<sup>22</sup>. This apparent association between temperature (higher in summer  
52  
53 months) and smoking may be the result of the relationship between extreme high  
54  
55 temperatures and negative affective states, stress and violence<sup>23, 24</sup>, as stress is well  
56  
57  
58  
59  
60

1  
2  
3 accepted as being linked to smoking<sup>9, 25, 26</sup>. Extreme high temperatures may influence  
4  
5 smoking behaviour by increasing stress and anxiety levels.  
6  
7

8  
9 Tobacco use is of major significance to the health gap affecting Indigenous Australians and is  
10  
11 highest in socially disadvantaged populations in geographically remote locations. Few  
12  
13 studies have assessed community exposures in relation to Indigenous smoking behaviour.  
14  
15

16 This study assessed smoking rates for remote Indigenous communities in relation to  
17  
18 community sociodemographic and climatic factors.  
19  
20  
21

## 22 **METHODS**

23  
24 This study is part of the Environments and Remote Indigenous Cardiometabolic Health  
25  
26 (EnRICH) Project which aimed to identify community features related to the cardiometabolic  
27  
28 health of Indigenous Australians living within remote communities across the Northern  
29  
30 Territory and Queensland. This study was conducted in accordance with the principles of the  
31  
32 Declaration of Helsinki. Ethics approvals were obtained from multiple Human Research  
33  
34 Ethics Committees (details in Ethics Approval section).  
35  
36  
37  
38  
39

### 40 **Sampling**

41  
42 This study used community health service records from the *One21seventy* program,  
43  
44 applying protocols for auditing of preventive healthcare developed by the Audit and Best  
45  
46 Practice for Chronic Disease (ABCD) Project<sup>27</sup>. The ABCD Audit Protocols defines community  
47  
48 health service client records eligible for audit via the following criteria: 1) aged between 15  
49  
50 and 54 years; 2) a community resident for  $\geq 6$  months per last 12 months; 3) not previously  
51  
52 diagnosed with diabetes, cardiovascular disease or chronic kidney disease; and 4) not  
53  
54 pregnant or  $< 6$  weeks postpartum. The audit sample was drawn from the identified eligible  
55  
56 client records with sample size determined according to program recommendations<sup>27</sup>.  
57  
58  
59  
60



1  
2  
3 Where there were more than 30 eligible records, records were randomly sampled with the  
4 size of the sample determined by a sliding scale based on the number of eligible records.  
5  
6

7  
8 Where the number of eligible client records was 30 or less, all records were sampled.  
9

10  
11 The current study accessed audit data according to the following inclusion criteria, the  
12 community was: (1) located within the Northern Territory or Queensland; (2) a 'remote'  
13 location<sup>28</sup>; and (3) a predominantly Indigenous community signed up to the ABCD National  
14 Research Partnership. Such communities were assigned a unique spatial identifier, allowing  
15 linkage with other datasets including ABS Census data expressed for Indigenous Locations  
16 (ILOCs)<sup>28</sup>. ILOCs are the smallest resolution at which Indigenous Census data are available,  
17 typically representing small (minimum 90 persons) Indigenous communities. Some (n=3)  
18 ILOCs include multiple nearby and associated very small communities. Communities  
19 belonging to such ILOCs were excluded from this study. Seventy communities met the above  
20 inclusion criteria and were included in this study.  
21  
22  
23  
24  
25  
26  
27  
28  
29  
30  
31  
32  
33  
34  
35

36 Audit data for the years 2010-2014 were extracted for each community (total n=8561  
37 records). Audit records were assessed for multiple client coverage using date of birth and  
38 sex, with the most recent record retained (n=5412). Records were excluded where the  
39 clients identified as 'Neither' an Aboriginal and/or Torres Strait Islander person (n=337) and  
40 clients whose last health centre attendance was prior to 1 January 2010 (n=395), leaving  
41 4680 records remaining. Audit data were aggregated by community.  
42  
43  
44  
45  
46  
47  
48  
49  
50

### 51 **Patient and Public Involvement**

52 Due to the reliance of this study on audit data of health service record, patients and the  
53 public were not involved in the design or execution of this research. However, sampled  
54  
55  
56  
57  
58  
59  
60

1  
2  
3 communities were extensively consulted and voluntarily participated in the *One21Seventy*  
4  
5 program from which health record audit data were sourced.  
6  
7

## 8 9 **Measures**

### 10 11 **Dependent variable**

12  
13 Community smoking rates were calculated from audit records. For each community,  
14  
15 smoking rate was calculated as the count of clinical records documenting status as 'smoker'  
16  
17 divided by the total records with a valid smoking status (i.e., sum of 'smoker' and 'non-  
18  
19 smoker'). Where smoking status was not recorded (i.e., 'no record' or 'not applicable') the  
20  
21 audit record was excluded (n=1991), leaving a final sample of 2689 records of Indigenous  
22  
23  
24  
25  
26  
27  
28  
29  
30  
31  
32  
33  
34  
35  
36  
37  
38  
39  
40  
41  
42  
43  
44  
45  
46  
47  
48  
49  
50  
51  
52  
53  
54  
55  
56  
57  
58  
59  
60  
Australians with an identifiable smoking status.

### 30 31 **Independent variables**

32  
33 Community-level Indigenous sociodemographic data were extracted from the ABS 2011  
34  
35 Population and Housing Census<sup>29</sup> and expressed at the ILOC spatial unit<sup>28</sup>. Data included:  
36  
37 *population size* (all persons); *count of Aboriginal and Torres Strait Islander persons*; *age*  
38  
39 (median); *overcrowding* (the percentage of dwellings requiring one or more additional  
40  
41 bedrooms based on household demographics); and *income* (median household).

42  
43 Proportions of Indigenous persons were calculated from the Census data for *education*  
44  
45 (grade 10 schooling or higher) and *employment* (aged 15 years and over in labour force).  
46  
47

48  
49  
50  
51  
52  
53  
54  
55  
56  
57  
58  
59  
60  
*Geographic connectivity* was expressed as a count of other Indigenous communities within a  
250km road-network distance<sup>30</sup> (mainland communities only; n=56).

Climate profiles were obtained from surface maps sourced from the Australian Bureau of  
Meteorology for the period 1961-2012<sup>31</sup>. Community-level climate measures representing

1  
2  
3 *heat* and *heavy rain* were determined as follows. Heat was operationalised as the average of  
4 the annual sum of 'cooling degree.days' in each community. 'Cooling degree.days' is a  
5 standard measure<sup>32</sup> defined as the number of degrees by which a day's mean temperature  
6 exceeds 18°C. For example, a day with a mean daily temperature of 25°C would attract a  
7 cooling degree.days score of 7 degree.days, whereas a day with a mean daily temperature  
8 of 16°C would attract a score of 0 degree.days. *Heavy Rain* was operationalised as the mean  
9 of the annual number of days with greater than 25 millimetres of precipitation.

10  
11  
12  
13  
14  
15  
16  
17  
18  
19  
20  
21 *Region* was determined according to the community geographic location within Australian  
22 Bureau of Meteorology Climate Zones<sup>33</sup>, with the climate zones 'Equatorial' and 'Tropical'  
23 collapsed to form the 'Coastal' Region, and the climate zones 'Desert' and 'Grassland'  
24 collapsed to form the 'Central' Region. Of the 70 included remote communities, 43 were  
25 classified as Coastal and 27 as Central.

### 36 **Data preparation**

37  
38  
39 Communities were classified as "high" or "low" based on the median community value for  
40 each variable except Region (classification defined above) (Table 1). Alternative cut points  
41 were considered, such as the 25<sup>th</sup> and 75<sup>th</sup> percentiles, however, use of other cut points  
42 resulted in very small cell sizes, particularly within stratified cross-tabulations, such that  
43 some cells included zero counts.

### 52 **Statistical analysis**

53  
54 Odds ratios (ORs) were calculated by two-by-two cross-tabulations of counts of  
55 communities classified as high or low smoking rate and counts of communities with high or  
56 low classifications of sociodemographic and climatic variables. Additional two-by-two cross-  
57  
58  
59  
60

tabulations stratified by community-level measures (sociodemographic measures, geographic connectivity, and region) were conducted to assess potential confounding.

Where the stratified groups were homogeneous (Breslow-Day test of homogeneity of ORs), adjusted pooled ORs were calculated using the mid-*p* method. Due to small counts within cells, 'exact' options (mid-*p* and mid-*p* 95% confidence intervals) were used throughout<sup>34</sup>.

All data preparation and analyses were conducted in SAS (version 9.4, SAS Institute Inc, Cary, North Carolina) and WinPepi (Compare2, version 3.85, J. Abramson).

## RESULTS

Features of communities are described in Table 1. Median population size was 332. Median population proportion identifying as Indigenous (i.e. Aboriginal and/or Torres Strait Islander) was 90.7%. Median smoking rate was 60.2% with a large range (25.0% - 96.0%).

**Table 1: Features of communities sampled (n=70)**

| Community feature                                                                   | Mean   | Median | IQR            | Min    | Max     |
|-------------------------------------------------------------------------------------|--------|--------|----------------|--------|---------|
| Population size (Count of total persons <sup>a</sup> )                              | 522.9  | 331.5  | 210.0-686.0    | 111    | 2124    |
| Indigenous persons (as proportion of total persons <sup>a</sup> ; %)                | 87.8   | 90.7   | 88.0-94.0      | 52.2   | 100.0   |
| Indigenous persons:                                                                 |        |        |                |        |         |
| Proportion who are smokers (% of audited records)                                   | 59.5   | 60.2   | 50.0-70.0      | 25.0   | 96.0    |
| Age (median <sup>a</sup> ; years)                                                   | 23.0   | 22.0   | 20.0-25.0      | 16.0   | 31.0    |
| Income (median household <sup>a</sup> ; AUD/week)                                   | 952.41 | 912.00 | 722.00-1125.00 | 312.00 | 2111.00 |
| Education (proportion with Year 10 schooling or greater <sup>a</sup> ; %)           | 55.3   | 58.2   | 36.8-73.1      | 9.4    | 85.2    |
| Employment (proportion in labour force <sup>a</sup> ; %)                            | 38.3   | 34.6   | 27.6-52.0      | 10.7   | 73.5    |
| Overcrowding (proportion of households requiring additional bedrooms <sup>a</sup> ) | 44.8   | 43.1   | 31.1-60.0      | 11.6   | 84.4    |

|                                                                                                            |        |        |           |        |        |
|------------------------------------------------------------------------------------------------------------|--------|--------|-----------|--------|--------|
| Geographic connectivity (count of Indigenous communities within 250km <sup>b</sup> -road network distance) | 10.8   | 6.0    | 4.0-14.0  | 2.0    | 39.0   |
| Heat (average annual cooling degree.days) <sup>c</sup>                                                     | 2908.5 | 3178.0 | 2293-3353 | 1678.0 | 3644.0 |
| Heavy Rain (average annual number of days with greater than 25 millimetres of precipitation, days/year)    | 14.4   | 15.7   | 4.2-24.4  | 2.4    | 25.6   |

<sup>a</sup>data relate to the ILOC associated with the selected community; <sup>b</sup>*n*=56 [mainland communities only]; <sup>c</sup> Heat, cooling degree.days is calculated as the average of the annual sum of the number of degrees by which each day's mean temperature exceeds 18°C.; AUD – Australian Dollars; ILOC – Indigenous Locations

Table 2 reports the results of the two-by-two (presented highest to lowest magnitude of OR) and stratified two-by-two cross-tabulations. Relatively high population communities were more likely to have high smoking rates (OR 6.25, [95% CI 2.18-17.95], *p*<0.001) compared to communities with low population size. Stratification into high and low conditions for sociodemographic measures and geographic connectivity revealed no differences in ORs between conditions (Breslow-Day test of homogeneity *p*>0.05) and pooled ORs remained moderately large (ORs ranging from 5.35-6.88, *p*-values <0.01 or smaller) though with greater attenuation when accounting for region (OR 4.43 [1.47-13.92], *p*<0.01).

High education communities were more likely to have high smoking rates (OR 3.67 [1.35-10.01], *p*=0.010) than communities with low education. Stratification by geographic connectivity and employment revealed differences in ORs between the high and low conditions. Amongst communities with high geographic connectivity, high community-level education was associated with high smoking rates (OR ∞ [2.68-∞], *p*=0.002). This relationship was not statistically significant among communities with low geographic connectivity. Similarly, amongst communities with low employment, the odds of high education communities being high in smoking rate rose strongly (OR 26.67 [3.03-621.30], *p*<0.001) while there was no statistically significant association with the high employment condition. Pooled ORs for high education communities being high in smoking rate, after

1  
2  
3 accounting for other measures, were small to moderate (OR 3.47 to 6.45,  $p < 0.05$  or  
4 smaller), except when accounting for region when the association became null. This reflects  
5  
6 the differing directions of associations between regions though the difference between  
7  
8 groups did not quite reach statistical significance (Breslow-Day test of homogeneity  
9  
10  $p=0.066$ ).

11  
12  
13  
14  
15  
16 Communities with frequent heavy rain were more likely to have high smoking rates (OR 3.67  
17 [1.35-10.01],  $p=0.010$ ). These odds were greater for communities with an older population  
18 (OR 18.20 [2.96-139.00],  $p < 0.001$ ) or low education (OR 10.50 [1.61-84.86],  $p=0.006$ ) while  
19 the odds became non-significant for communities with a younger population or high  
20 education. Pooled ORs remained of small to moderate strength when accounting for  
21 household income (OR 3.51 [1.28-10.05]  $p=0.014$ ), employment (OR 3.12 [1.03-9.89],  
22  $p=0.043$ ), overcrowding (OR 4.67 [1.51-16.28]  $p=0.007$ ), and geographic connectivity (OR  
23 7.45 [1.86-33.39]  $p=0.004$ ). However, upon accounting for population size the odds of  
24 communities with frequent heavy rain being high in smoking rate were non-significant.  
25  
26 When stratifying by region, no central communities were classified as having frequent heavy  
27 rain and the association between frequent heavy rain and smoking was null for the coastal  
28 communities.  
29  
30  
31  
32  
33  
34  
35  
36  
37  
38  
39  
40  
41  
42  
43  
44  
45

46 Community income was associated with smoking rate (OR 2.86 [1.07-7.67],  $p=0.036$ ).  
47  
48 Stratification into high and low conditions for sociodemographic measures and geographic  
49 connectivity revealed no differences in ORs between groups, and pooled ORs were small to  
50 moderate (range 2.31-3.75) but were not statistically significant when accounting for  
51 population size, geographic connectivity, or region.  
52  
53  
54  
55  
56  
57  
58  
59  
60

1  
2  
3 Heat was also associated with community smoking rate (OR 2.86 [1.07-7.67],  $p=0.036$ ) and  
4 the odds of a hotter climate community being high in smoking rose notably under the  
5  
6 following conditions: low education (OR 13.33 [2.30-79.93],  $p=0.001$ ); low employment (OR  
7  
8 12.67 [2.06-98.54]  $p=0.004$ ), high overcrowding (OR 9.17 [1.82-50.20],  $p=0.004$ ), high  
9  
10 connectivity (OR  $\infty$  [5.44- $\infty$ ]  $p<0.001$ ), and central region (OR  $\infty$  [2.61- $\infty$ ],  $p<0.01$ ). Amongst  
11  
12 coastal communities, high heat was associated with a lesser likelihood of being a high  
13  
14 smoking community (OR 0.15 [0.01-1.07],  $p<0.05$ ). Pooled ORs were small to moderate  
15  
16 when accounting for average population age (OR 3.80 [1.31-12.04]  $p=0.013$ ), and income  
17  
18 (OR 2.90 [1.07-8.23]  $p=0.036$ ) but there was no statistically significant association when  
19  
20 accounting for population size.  
21  
22  
23  
24  
25  
26  
27

28 Community employment was not associated with smoking rate (OR 2.25 [0.85-5.94],  
29  
30  $p=0.103$ ) but under the low community education condition the odds of high employment  
31  
32 communities being high in smoking rose substantially (OR 6.67 [1.20-39.16],  $p=0.026$ ).  
33  
34 Stratifying by location revealed ORs differing in directions. Amongst coastal communities,  
35  
36 high employment rate was inversely associated with smoking rate (OR 0.32 [0.04-1.63])  
37  
38 while amongst central communities, high employment was directly associated with high  
39  
40 smoking rate (OR 4.75 [0.37-53.66]). These region-specific associations, however, did not  
41  
42 reach statistical significance. Pooled ORs accounting for other sociodemographic measures  
43  
44 or geographic connectivity yielded small but statistically non-significant effects (ORs ranging  
45  
46 from 2.05-2.88).  
47  
48  
49  
50  
51  
52  
53  
54  
55  
56  
57  
58  
59  
60

**Table 2: Associations between counts of communities with high levels of sociodemographic and climatic features, and high smoking proportion, accounting for potential confounders (n=70, 95% CIs calculated using exact methods [mid-p])**

| Exposure           | OR (95% CI)          | Stratifying variable                 | OR (95% CI)<br>(high condition or<br>coastal region) | OR (95% CI)<br>(low condition or<br>central region) | Breslow-Day<br>test of<br>homogeneity | Pooled OR (95% CI)   |
|--------------------|----------------------|--------------------------------------|------------------------------------------------------|-----------------------------------------------------|---------------------------------------|----------------------|
| Population<br>size | 6.25 (2.18-17.95)*** | Age                                  | 18.20 (2.96-139.00)***                               | 3.30 (0.80-13.92)                                   | 0.134                                 | 6.44 (2.27-19.81)*** |
|                    |                      | Income                               | 4.27 (0.95-19.29)                                    | 7.65 (1.56-38.03)**                                 | 0.589                                 | 5.35 (1.90-15.95)**  |
|                    |                      | Education                            | 8.50 (1.65-47.26)*                                   | 4.57 (0.98-21.87)                                   | 0.578                                 | 5.81 (2.01-18.11)**  |
|                    |                      | Employment                           | 4.06 (0.92-18.84)                                    | 15.00 (2.55-113.26)**                               | 0.258                                 | 6.88 (2.36-22.19)*** |
|                    |                      | Overcrowding                         | 5.11 (1.14-23.81)*                                   | 9.33 (1.86-50.93)**                                 | 0.584                                 | 6.41 (2.26-19.72)*** |
|                    |                      | Geographic connectivity <sup>a</sup> | 2.92 (0.53-15.91)                                    | 16.00 (1.98-141.91)**                               | 0.192                                 | 5.66 (1.67-20.72)**  |
|                    |                      | Region                               | 5.66 (1.36-23.67)*                                   | 3.20 (0.41-23.38)                                   | 0.633                                 | 4.43 (1.47-13.92)**  |
| Education          | 3.67 (1.35-10.01)*   | Population size                      | 4.96 (0.97-27.80)*                                   | 2.67 (0.56-13.04)                                   | 0.578                                 | 3.47 (1.18-10.79)*   |
|                    |                      | Age                                  | 3.78 (0.85 – 17.67)                                  | 4.50 (1.03-20.58)*                                  | 0.868                                 | 3.96 (1.45-11.51)**  |
|                    |                      | Income                               | 4.81 (1.01-25.98)                                    | 4.81 (1.01-25.98)                                   | 1.000                                 | 4.59 (1.59-14.62)**  |
|                    |                      | Employment                           | 0.68 (0.12-3.43)                                     | 26.67 (3.03-621.30)***                              | 0.005                                 | -                    |
|                    |                      | Overcrowding                         | 4.36 (0.73-34.91)                                    | 11.90 (1.44-284.38)*                                | 0.485                                 | 6.45 (1.75-30.92)**  |
|                    |                      | Geographic connectivity <sup>a</sup> | ∞ (2.68-∞)**                                         | 1.00 (0.16-5.69)                                    | 0.016                                 | -                    |
|                    |                      | Region                               | 0.72 (0.13-3.25)                                     | 10.00 (0.56-307.27)                                 | 0.066                                 | 1.37 (0.36-4.86)     |
| Heavy Rain         | 3.67 (1.35-10.01)*   | Population size                      | 4.75 (0.93-24.21)*                                   | 1.42 (0.28-6.70)                                    | 0.274                                 | 2.50 (0.85-7.44)     |
|                    |                      | Age                                  | 18.20 (2.96-139.00)***                               | 1.29 (0.33-5.02)                                    | 0.016                                 | -                    |
|                    |                      | Income                               | 4.82 (1.06-22.78)*                                   | 2.80 (0.65-12.18)                                   | 0.603                                 | 3.51 (1.28-10.05)*   |
|                    |                      | Education                            | 0.57 (0.07-3.34)                                     | 10.50 (1.61-84.86)**                                | 0.020                                 | -                    |
|                    |                      | Employment                           | 1.28 (0.25-6.25)                                     | 9.50 (1.55-74.66)*                                  | 0.089                                 | 3.12 (1.03-9.89)*    |



1  
2  
3  
4  
5  
6  
7  
8  
9  
10  
11  
12  
13  
14  
15  
16  
17  
18  
19  
20  
21  
22  
23  
24  
25  
26  
27  
28  
29  
30  
31  
32  
33  
34  
35  
36  
37  
38  
39  
40  
41  
42  
43  
44  
45  
46

|            |                   |                                      |                      |                      |         |                     |
|------------|-------------------|--------------------------------------|----------------------|----------------------|---------|---------------------|
|            |                   | Overcrowding                         | 7.11 (1.24-58-4.83)* | 3.50 (0.71-19.50)    | 0.553   | 4.67 (1.51-16.28)** |
|            |                   | Geographic connectivity <sup>a</sup> | ∞ (2.68-∞)**         | 3.25 (0.56-18.53)    | 0.091   | 7.25 (1.86-33.39)** |
|            |                   | Region                               | 0.64 (0.08-3.59)     | NO DATA              | NO DATA | -                   |
| Income     | 2.86 (1.07-7.67)* | Population size                      | 1.78 (0.37-8.28)     | 3.19 (0.66-15.71)    | 0.589   | 2.31 (0.80-6.83)    |
|            |                   | Age                                  | 2.57 (0.61-10.81)    | 3.10 (0.76-12.67)    | 0.852   | 2.74 (1.04-7.43)*   |
|            |                   | Education                            | 3.90 (0.82-21.18)    | 3.90 (0.82-21.18)    | 1.000   | 3.75 (1.29-11.93)*  |
|            |                   | Employment                           | 3.60 (0.84-15.69)    | 2.17 (0.52-8.97)     | 0.615   | 2.70 (1.01-7.41)*   |
|            |                   | Overcrowding                         | 2.60 (0.59-12.18)    | 4.67 (0.97-25.35)    | 0.589   | 3.33 (1.18-10.07)*  |
|            |                   | Geographic connectivity <sup>a</sup> | 2.75 (0.56-14.03)    | 3.14 (0.56-19.17)    | 0.909   | 2.81 (0.91-9.16)    |
|            |                   | Region                               | 2.18 (0.57-8.34)     | 4.00 (0.54-35.79)    | 0.608   | 2.58 (0.89-7.80)    |
| Heat       | 2.86 (1.07-7.67)* | Population size                      | 1.50 (0.32-6.94)     | 4.96 (0.97-27.80)*   | 0.277   | 2.59 (0.90-7.77)    |
|            |                   | Age                                  | 7.22 (1.28-55.09)*   | 2.45 (0.57-11.30)    | 0.344   | 3.80 (1.31-12.04)*  |
|            |                   | Income                               | 2.31 (0.55-9.97)     | 3.94 (0.88-18.40)    | 0.606   | 2.90 (1.07-8.23)*   |
|            |                   | Education                            | 0.31 (0.04-1.72)     | 13.33 (2.30-79.93)** | 0.001   | -                   |
|            |                   | Employment                           | 0.55 (0.10-2.66)     | 12.67 (2.06-98.54)** | 0.007   | -                   |
|            |                   | Overcrowding                         | 9.17 (1.82-50.20)**  | 1.10 (0.27-4.43)     | 0.043   | -                   |
|            |                   | Geographic connectivity <sup>a</sup> | ∞ (5.44 - ∞)***      | 0.80 (0.15-4.25)     | 0.002   | -                   |
|            |                   | Region                               | 0.15 (0.01-1.07)*    | ∞ (2.61-∞)**         | <0.001  | -                   |
| Employment | 2.25 (0.85-5.94)  | Population size                      | 1.63 (0.35-7.91)     | 6.00 (1.06-46.31)*   | 0.258   | 2.88 (0.97-9.28)    |
|            |                   | Age                                  | 2.75 (0.65-11.89)    | 2.04 (0.51-8.16)     | 0.762   | 2.30 (0.88-6.19)    |
|            |                   | Income                               | 2.80 (0.65-12.18)    | 1.69 (0.40-7.03)     | 0.615   | 2.18 (0.79-5.80)    |
|            |                   | Education                            | 0.17 (0.01-1.35)     | 6.67 (1.20-39.16)*   | 0.008   | -                   |
|            |                   | Overcrowding                         | 2.73 (0.54-15.53)    | 2.73 (0.54-15.53)    | 1.000   | 2.65 (0.87-8.66)    |
|            |                   | Geographic connectivity <sup>a</sup> | 6.67 (0.95-56.74)*   | 0.79 (0.13-4.38)     | 0.091   | 2.05 (0.61-6.91)    |

1  
2  
3  
4  
5  
6  
7  
8  
9  
10  
11  
12  
13  
14  
15  
16  
17  
18  
19  
20  
21  
22  
23  
24  
25  
26  
27  
28  
29  
30  
31  
32  
33  
34  
35  
36  
37  
38  
39  
40  
41  
42  
43  
44  
45  
46

|        |                  |                   |       |   |
|--------|------------------|-------------------|-------|---|
| Region | 0.32 (0.04-1.63) | 4.75 (0.37-53.66) | 0.040 | - |
|--------|------------------|-------------------|-------|---|

---

OR = Odds Ratio; CI = Confidence Interval; <sup>a</sup> n=56 (mainland communities only); \*p<0.05; \*\*p<0.01; \*\*\*p<0.001

For peer review only

## DISCUSSION

This ecological study assessed Indigenous Australian smoking rates based on health-audit records, within predominantly Indigenous remote communities, in relation to community-level sociodemographic and climatic factors. We observed substantial variation in Indigenous smoking rates between remote communities, from 25% to 96%, a broader range than previously reported. Other studies reported rates as ranging between 59% to 80%<sup>14</sup> and 27% to 68%<sup>35</sup>.

Our observed variation may be, in part, due to the large degree of sample loss resulting from audit client records missing smoking information. Wright and colleagues<sup>35</sup> noted particularly small sample sizes available for some Indigenous regions which may impact on the precision of estimates and artificially inflate the range of smoking rates reported. To better understand geographic variation in smoking rate, its associated factors, and change in rates over time, better quality data are needed. Regardless, our findings align with previously identified substantial geographic variation in smoking between remote Indigenous communities. This variation has important implications for intervention strategies, suggesting the need for localised approaches targeting communities according to smoking prevalence. It is, however, important to note that regional variation in smoking rates has a basis in the history of tobacco usage among Indigenous Australians, with exposure to smoked tobacco (in contrast to the custom of chewing native, nicotine-containing flora) preceding Western colonisation and occurring in littoral regions of the Northern Territory and Queensland via trade<sup>10</sup>. This study stratified cross-tabulations by region in order to account for this previously established variation in smoking rates.

1  
2  
3 Our findings indicate smoking rate covaries with community-level features, notably,  
4  
5 population size, education level, income, heat, and frequency of heavy rain. Some effects  
6  
7 varied given other community conditions. Communities with larger populations were more  
8  
9 likely to have high smoking rates. This may reflect greater access to cigarettes as larger  
10  
11 communities likely have more services including retail outlets for cigarettes. Relatively high-  
12  
13 income communities were also more likely to have high smoking rates, suggesting greater  
14  
15 ability to afford cigarettes. This association was nullified, however, by accounting for  
16  
17 population size, geographic connectivity, and region (itself related to both population size  
18  
19 and geographic connectivity), given that with greater population size and geographic  
20  
21 connectivity comes greater income earning opportunity.  
22  
23  
24  
25  
26  
27

28  
29 Communities with a relatively high education level were more likely to have high smoking  
30  
31 rates, particularly if the community also had low levels of employment or high geographic  
32  
33 connectivity to other Indigenous communities. The direction of this relationship is  
34  
35 unexpected, as individual-level education and area-level SES are both inversely related to  
36  
37 individual smoking in the Australian population in general, and Indigenous Australians in  
38  
39 particular<sup>36, 37</sup>. Greater education with lesser opportunity to apply that education through  
40  
41 employment could, however, constitute a substantial stressor that supports smoking as a  
42  
43 coping strategy.  
44  
45  
46  
47

48  
49 It is possible that relationships observed between community smoking rate and  
50  
51 sociodemographic features (population size and education level) reflect complex historic  
52  
53 and ongoing social pathologies. Larger communities may consist of multiple displaced, and  
54  
55 sometimes feuding, family groups forcefully relocated from their traditional homelands to a  
56  
57 mission site<sup>38</sup>. Forced removal from traditional lands breaks the important connection that  
58  
59  
60

1  
2  
3 Indigenous Australians have to Country, a connection important to their wellbeing<sup>39</sup>.

4  
5 Moreover, forced dispossession and resettlement disrupted established traditional lifestyles  
6  
7 and social systems whilst failing to provide an adequate alternate cultural system, resulting  
8  
9 in reduced quality of lifestyle<sup>40</sup>.

10  
11  
12  
13 This disruption of traditional structures and inadequate replacement with new structures,  
14  
15 and the lack of acceptance into the western social system could lead to anomie and  
16  
17 collective despondency, exacerbated by cultural bereavement<sup>41-43</sup>. It follows that such  
18  
19 communities would have higher smoking rates amongst other social problems. Indeed,  
20  
21 communities with a long history of receiving forcefully displaced groups and where  
22  
23 maximum dysfunctional cultural change has occurred are most likely to exhibit social  
24  
25 pathologies and disorder, including violence and self-harm<sup>40</sup>. We speculate that the  
26  
27 unexpected association found in this study between high education and high smoking rate,  
28  
29 particularly in communities with low employment, exemplifies the lack of social integration  
30  
31 and acceptance into western social structures and resultant coping behaviour.  
32  
33  
34  
35  
36  
37  
38

39 Relatively high community-level Western-style education may correspond to a reduced  
40  
41 reliance on traditional social structures. Yet, higher levels of education may not overcome  
42  
43 institutional racism and enable Indigenous individuals and groups to be truly accepted  
44  
45 within the broader, non-Indigenous societal structures and take advantage of related  
46  
47 opportunities. This latter point would be highlighted to the individual and the community by  
48  
49 lack of employment. Smoking rate is likely a symptom of the broader issues faced by remote  
50  
51 Indigenous communities and attempts to reduce smoking without considering these  
52  
53 broader issues are unlikely to be effective. Interventions targeting proximal individual-level  
54  
55 determinants of smoking need to be supported by efforts to improve distal community-level  
56  
57  
58  
59  
60

1  
2  
3 and societal factors<sup>44</sup>. Broad ecological approaches collaborating with local Indigenous  
4  
5 representatives to facilitate local empowerment are needed with the focus on reducing the  
6  
7 underlying social problems and ensuing social psychological states that predispose  
8  
9 individual smoking behaviours<sup>26</sup>.  
10  
11  
12

13  
14 Regarding climatic exposures, the influence of weather on smoking has rarely been  
15  
16 assessed, especially in Indigenous populations. We observed frequent heavy rain to be  
17  
18 associated with high smoking rates, particularly where community residents had a higher  
19  
20 median age. However, this relationship may be an artefact of the association between  
21  
22 region and smoking, as frequent heavy rain occurred only in the coastal region, and coastal  
23  
24 communities were more likely to be high in smoking rate. Heat was also associated with  
25  
26 high smoking rates, particularly in communities with low education, low employment, high  
27  
28 overcrowding, high geographic connectivity and central region. This supports our premise  
29  
30 regarding heat as a stressor affecting smoking behaviour, an effect seemingly compounded  
31  
32 by other adverse conditions. In particular, the strong positive relationship between high  
33  
34 heat and smoking in the central region suggests the relationship between heat and smoking  
35  
36 rate is not due to confounding by region. If stress due to ongoing, inescapable heat is indeed  
37  
38 related to smoking, as our findings suggest, this supports the need for better quality,  
39  
40 culturally appropriate housing to ameliorate such stress. It is possible, however, that the  
41  
42 apparent association between heat and smoking rate is due to other factors not measured  
43  
44 here. These associations are novel and warrant further exploration.  
45  
46  
47  
48  
49  
50  
51  
52

53  
54 This study builds on and expands the literature on Australian Indigenous smoking as few  
55  
56 studies have assessed smoking rates of remote Indigenous communities, especially in  
57  
58 relation to community-level factors. It identifies relationships between community smoking  
59  
60

1  
2  
3 rate and community features and provides a snapshot of smoking rates in remote  
4  
5 Indigenous communities. Though specific to Australian remote Indigenous communities,  
6  
7 these findings may be broadly generalisable to other remote-dwelling indigenous  
8  
9 populations in high-income countries as such populations have similar characteristics and  
10  
11 have experienced similar historical exposures. Some limitations should be noted. The cross-  
12  
13 sectional nature of this study limits inference on the temporal direction of associations. Use  
14  
15 of clinical audit data only captures information for individuals who accessed western health-  
16  
17 care services. Individual-level audit record sample loss due to missing smoking information  
18  
19 may have introduced bias to the data and be indicative of deficient health assessment and  
20  
21 data collection procedures at the local health service level. Similarly, the use of audit  
22  
23 records creates a selection bias (e.g., not including records with chronic diseases) hence our  
24  
25 results likely under-estimate the prevalence of smoking. Limitations in the assessment of  
26  
27 community-level smoking have been noted in other studies<sup>35, 45</sup>. Potential confounding due  
28  
29 to residential self-selection toward smaller and potentially healthier communities could not  
30  
31 be accounted for. Given the small sample size and the desire to assess simple associations,  
32  
33 the common and recommended<sup>46</sup> epidemiological approach of dichotomising the data at  
34  
35 the median was utilised. We acknowledge that the categorisation of these data results in  
36  
37 some information loss. Finally, this study is ecological and associations between community  
38  
39 smoking rates and community factors should not be inferred at the individual level. The  
40  
41 environmental correlates of smoking rates stand to differ from the predictors of individual  
42  
43 smoking initiation and cessation.  
44  
45  
46  
47  
48  
49  
50  
51  
52  
53  
54  
55  
56  
57  
58  
59  
60

## CONCLUSION

This study found substantial variation in smoking rates between Australian remote Indigenous communities, and that community-level sociodemographic (relatively large population size, high education level, and high income), and climatic factors (heat and frequent heavy rain) were associated with high smoking rates. Better data are needed to more accurately assess differences in community smoking rates, the ecological factors relating to these differences, and to track change in smoking rates over time. Further assessment of climatic factors, particularly heat, in relation to smoking is warranted.

Community smoking rate is likely associated with adverse historical experiences and local pathologies. Efforts to reduce smoking rates should include a focus on improving local social conditions using a collaborative approach distinct from traditional forms of health education.



## DECLARATIONS

### Acknowledgements

The authors wish to acknowledge Veronica Matthews, Senior Research Officer, ABCD National Research Partnership for assistance in data provision. The development of this manuscript would not have been possible without the active support, enthusiasm and commitment of staff in participating primary health care services, and members of the ABCD National Research Partnership and the Centre for Research Excellence in Integrated Quality Improvement.

### Funding

This work was supported by the Australian Research Council [grant number DP120102482] and drew upon data collected as part of the *One21seventy* project. *One21seventy* is a continuous quality improvement (CQI) program developed as part of the ABCD National Research Partnership Project (both the ABCD National Research Partnership Project and the Centre for Research Excellence in Integrated Quality Improvement were funded by the National Health and Medical Research Council [GNT545267; GNT1078927 respectively] and the Lowitja Institute, and by financial and in-kind support from a range of Community Controlled and Government agencies). The Audit and Best Practice for Chronic Disease Extension (ABCDE) Project was supported by funding from the Cooperative Research Centre for Aboriginal Health and the Australian Commission on Safety and Quality in Health Care. The funding sources had no involvement with study design, data collection, analysis and interpretation of results, writing this manuscript or choice of journal.

### Competing interests

The authors declare they have no competing interests.

### Ethics approval and consent to participate

Ethics approval for the present study was obtained from the Human Research Ethics Committee (HREC) of University of South Australia [HREC Reference No. 31874], Central Australian Human Research Ethics Committee [HREC-13-182], Human Research Ethics Committee of the Northern Territory Department of Health and Menzies School of Health Research [HREC 2013-2083], and Far North Queensland Human Research Ethics Committee [HREC/15/QCH/4-946]. Ethics approvals for the ABCD National Research Partnership, for the

1  
2  
3 geographic area pertaining to this study, were obtained from HRECs in the states and  
4 territories involved: the HREC of the Northern Territory Department of Health and Menzies  
5 School of Health Research (HREC-EC00153); Central Australian HREC (HREC-12-53);  
6 Queensland HREC Darling Downs Health Services District (HREC/11/QTDD/47); and the  
7 South Australian Indigenous Health Research Ethics Committee (04-10-319). Protocols for  
8 sharing de-identified client-level data by participating health services are managed by the  
9 ABCD National Research Partnership.  
10  
11  
12  
13  
14  
15

### 16 **Consent for publication**

17  
18 Not applicable as the research presented in this manuscript is not a case study, nor does it  
19 contain any individual person's data in any form.  
20  
21  
22

### 23 **Data availability**

24  
25 Research involving Aboriginal and Torres Strait Islander peoples is strictly governed in  
26 Australia by the Australian Code for the Responsible Conduct of Research and Values and  
27 Ethics: Guidelines for Ethical Conduct in Aboriginal and Torres Strait Islander Health  
28 Research. In order to comply with these national regulations, both the legal agreements  
29 governing health service participation in the ABCD National Research Partnership and the  
30 human research ethics committee approvals of multiple jurisdictions preclude the sharing of  
31 a de-identified data set without evidence that its proposed use addresses the ethical  
32 requirements of Reciprocity, Respect, Equality, Responsibility, Survival and Protection, and  
33 Spirit and Integrity. Data requests addressing these criteria may be sent to the ABCD  
34 National Research Partnership Data Access Committee care of Professor Ross Bailie  
35 ([ross.bailie@sydney.edu.au](mailto:ross.bailie@sydney.edu.au)).  
36  
37  
38  
39  
40  
41  
42  
43  
44  
45

### 46 **Authors' contributions**

47  
48 SC prepared the data, performed analyses, interpreted results and contributed to the  
49 drafting and revision of the manuscript. MJD performed analyses, interpreted results and  
50 contributed to the drafting and revision of the manuscript. RB conceived of and designed  
51 the study and contributed to the revision of the manuscript. MD conceived of and designed  
52 the study, interpreted results and contributed to the drafting and revision of the  
53 manuscript. All authors approved the final manuscript.  
54  
55  
56  
57  
58  
59  
60

## REFERENCES

1. CDC. How tobacco smoke causes disease: the biology and behavioral basis for smoking-attributable disease: a report of the Surgeon General. Atlanta, GA: Centers for Disease Control and Prevention (US), 2010.
2. Willi C, Bodenmann P, Ghali WA, et al. Active smoking and the risk of type 2 diabetes: A systematic review and meta-analysis. *JAMA* 2007;298(22):2654-64. doi: 10.1001/jama.298.22.2654
3. Jamal A, Homa DM, O'Connor E, et al. Current cigarette smoking among adults—United States, 2005–2014. . *Morbidity and Mortality Weekly Report, Centers for Disease Control and Prevention* 2015; 64(44).  
[http://www.cdc.gov/mmwr/preview/mmwrhtml/mm6444a2.htm?s\\_cid=mm6444a2\\_w](http://www.cdc.gov/mmwr/preview/mmwrhtml/mm6444a2.htm?s_cid=mm6444a2_w) (accessed 24 August 2016).
4. Statistics Canada. Aboriginal statistics at a glance. 2nd ed. Canada: Statistics Canada, 2015.
5. Ministry of Health. Annual update of key results 2015/16: New Zealand Health Survey. In: Health Mo, ed. Wellington: Ministry of Health, 2016.
6. AIHW. Australia's health 2018. Australia's health series no. 16. ed. AIHW: Canberra, 2018.
7. Vos T, Barker B, Begg S, et al. Burden of disease and injury in Aboriginal and Torres Strait Islander Peoples: the Indigenous health gap. *International Journal of Epidemiology* 2009;38(2):470-77. doi: 10.1093/ije/dyn240
8. Briggs VL, Lindorff KJ, Ivers RG. Aboriginal and Torres Strait Islander Australians and tobacco. *Tobacco Control* 2003;12(suppl 2):ii5-ii8. doi: 10.1136/tc.12.suppl\_2.ii5
9. Thomas DP, Briggs V, Anderson IPS, et al. The social determinants of being an Indigenous non-smoker. *Australian and New Zealand Journal of Public Health* 2008;32(2):110-16. doi: 10.1111/j.1753-6405.2008.00185.x
10. Scollo M, Winstanley M. Tobacco in Australia: facts and issues. Melbourne, Australia: Cancer Council Victoria; 2017 [Available from: <http://www.TobaccoInAustralia.org.au> accessed May 30 2018].
11. Australian Health Ministers' Advisory Council. Aboriginal and Torres Strait Islander Health Performance Framework 2014 Report. Canberra: Australian Health Ministers' Advisory Council, 2015.
12. AIHW. Cardiovascular disease, diabetes and chronic kidney disease—Australian facts: Aboriginal and Torres Strait Islander people. Cardiovascular, diabetes and chronic kidney disease series Canberra, 2015.
13. Robertson JR, Stevenson L, Usher K, et al. A review of trends in Indigenous Australian tobacco research (From 2004 to 2013), its associated outputs and evidence of research translation. *Nicotine & Tobacco Research* 2015;17(8):1039-48. doi: 10.1093/ntr/ntv018
14. Ivers RG, Castro A, Parfitt D, et al. Evaluation of a multi-component community tobacco intervention in three remote Australian Aboriginal communities. *Australian and New Zealand Journal of Public Health* 2006;30(2):132-36. doi: 10.1111/j.1467-842X.2006.tb00105.x
15. Virtanen M, Kivimäki M, Kouvonen A, et al. Average household income, crime, and smoking behaviour in a local area: the Finnish 10-Town study. *Social Science & Medicine* 2007;64(9):1904-13. doi: 10.1016/j.socscimed.2007.01.005
16. van Lenthe FJ, Mackenbach JP. Neighbourhood and individual socioeconomic inequalities in smoking: the role of physical neighbourhood Stressors. *Journal of Epidemiology and Community Health* 2006;60(8):699-705.
17. Andrews JO, Mueller M, Newman SD, et al. The association of individual and neighborhood social cohesion, stressors, and crime on smoking status among African-American women in southeastern US subsidized housing neighborhoods. *Journal of Urban Health* 2014;91(6):1158-74. doi: 10.1007/s11524-014-9911-6
18. Brady M. Historical and cultural roots of tobacco use among Aboriginal and Torres Strait Islander people. *Australian and New Zealand Journal of Public Health* 2002;26(2):120-24.

19. Macknight C. The view from Marege': Australian knowledge of Makassar and the impact of the trepang industry across two centuries. *Aboriginal History* 2011;35:121-43.
20. Webb L, Bambrick H, Tait P, et al. Effect of ambient temperature on Australian Northern Territory public hospital admissions for cardiovascular disease among Indigenous and Non-Indigenous populations. *International Journal of Environmental Research and Public Health* 2014;11(2) doi: 10.3390/ijerph110201942
21. Chandra S, Chaloupka FJ. Seasonality in cigarette sales: patterns and implications for tobacco control. *Tobacco control* 2003;12(1):105-07.
22. Momperousse D, Delnevo CD, Lewis MJ. Exploring the seasonality of cigarette-smoking behaviour. *Tobacco Control* 2007;16(1):69-70.
23. Anderson CA. Temperature and aggression: ubiquitous effects of heat on occurrence of human violence. *Psychological Bulletin* 1989;106(1):74-96. doi: 10.1037/0033-2909.106.1.74
24. Anderson CA. Heat and violence. *Current Directions in Psychological Science* 2001;10(1):33-38. doi: 10.1111/1467-8721.00109
25. Choi D, Ota S, Watanuki S. Does cigarette smoking relieve stress? Evidence from the event-related potential (ERP). *International Journal of Psychophysiology* 2015;98(3):470-76. doi: 10.1016/j.ijpsycho.2015.10.005
26. Daniel M, Cargo MD, Lifshay J, et al. Cigarette smoking, mental health and social support: data from a Northwestern First Nation. *Canadian Journal of Public Health / Revue Canadienne de Sante'e Publique* 2004;95(1):45-49.
27. Menzies School of Health Research. Improving the quality of primary health care - a primary training manual for the One21seventy cycle. Darwin: Menzies School of Health Research, 2014.
28. Australian Bureau of Statistics. Australian Standard Geographical Classification (ASGC). Canberra: Australian Bureau of Statistics, 2011.
29. Australian Bureau of Statistics. Census of Population and Housing - 2011 Census Products Canberra: Australian Bureau of Statistics; 2011 [2011].
30. Department of Human Services. 2013 Australian Government Indigenous Programs & Policy Locations (AGIL). In: Australia Co, ed. Canberra: Department of Human Services, 2013.
31. Bureau of Meteorology. Climate Data Online. Canberra, Australia: Australian Government, Bureau of Meteorology 2016.
32. Australian Government Bureau of Meteorology. Annual and monthly heating and cooling degree days 2018 [Available from: <http://www.bom.gov.au/climate/map/heating-cooling-degree-days/documentation.shtml> accessed 17/12/2018 2018].
33. Stern H, de Hoedt G, Ernst J. Objective classification of Australian climates. *Australian Meteorological Magazine* 2000;49(2):87-96.
34. Berry G, Armitage P. Mid-P Confidence Intervals: A Brief Review. *Series D (The Statistician)* 1995;44(4):417-23. doi: 10.2307/2348891
35. Wright A, Lovett R, Roe Y, et al. Enhancing national data to align with policy objectives: Aboriginal and Torres Strait Islander smoking prevalence at finer geographic levels. *Australian Health Review* 2017:-. doi: 10.1071/AH16269
36. AIHW. Tobacco indicators baseline data: reporting under the National Tobacco Strategy 2012–2018. Drug statistics series. Canberra: Australian Institute of Health and Welfare, 2015.
37. AIHW. The health and welfare of Australia's Aboriginal and Torres Strait Islander peoples: 2015 Canberra: Australian Institute of Health and Welfare, 2015.
38. Homel R, Lincoln R, Herd B. Risk and resilience: crime and violence prevention in Aboriginal communities. *The Australian and New Zealand journal of Criminology* 1999;32(2):182-96.
39. Kingsley JY, Townsend M, Phillips R, et al. "If the land is healthy ... it makes the people healthy": the relationship between Caring for Country and health for the Yorta Yorta Nation, Boonwurrung and Bangerang Tribes. *Health & Place* 2009;15(1):291-99. doi: 10.1016/j.healthplace.2008.05.009

- 1  
2  
3 40. Memmot P, Stacy R, Chambers C, et al. Violence in Indigenous communities. In: Aboriginal  
4 Environments Research Centre UoQ, ed. Canberra: Commonwealth Attorney-General's  
5 Department, 2001.  
6  
7 41. Morrison K. Marx, Durkheim, Weber: formations of modern social thought. 2nd ed. London: Sage  
8 Publications Ltd 2006.  
9  
10 42. Spencer D. Anomie and demoralization in transitional cultures: the Australian Aboriginal model.  
11 *Transcultural Psychiatry* 2000;37(1):5-10.  
12  
13 43. Durkheim E. Suicide: a study in sociology. London: Routledge & Kegan 2005 [1897].  
14  
15 44. Graham H, Inskip HM, Francis B, et al. Pathways of disadvantage and smoking careers: evidence  
16 and policy implications. *Journal of Epidemiology and Community Health* 2006;60(Suppl 2):ii7-  
17 ii12. doi: 10.1136/jech.2005.045583  
18  
19 45. Butler R, Chapman S, Thomas DP, et al. Low daily smoking estimates derived from sales  
20 monitored tobacco use in six remote predominantly Aboriginal communities. *Australian &*  
21 *New Zealand Journal of Public Health* 2010;34(Suppl 1):S71-S75. doi: 10.1111/j.1753-  
22 6405.2010.00557.x.  
23  
24  
25  
26  
27  
28  
29  
30  
31  
32  
33  
34  
35  
36  
37  
38  
39  
40  
41  
42  
43  
44  
45  
46  
47  
48  
49  
50  
51  
52  
53  
54  
55  
56  
57  
58  
59  
60

STROBE Statement—Checklist of items that should be included in reports of *cross-sectional studies*

|                              | Item No | Recommendation                                                                                                                                                                                                                                                                                                                                                                                                                                                                                                                                  |
|------------------------------|---------|-------------------------------------------------------------------------------------------------------------------------------------------------------------------------------------------------------------------------------------------------------------------------------------------------------------------------------------------------------------------------------------------------------------------------------------------------------------------------------------------------------------------------------------------------|
| <b>Title and abstract</b>    | 1       | (a) Indicate the study's design with a commonly used term in the title or the abstract<br><b>The term 'Ecological' is included within the Abstract (Background)</b><br>(b) Provide in the abstract an informative and balanced summary of what was done and what was found<br><b>See Abstract Section</b>                                                                                                                                                                                                                                       |
| <b>Introduction</b>          |         |                                                                                                                                                                                                                                                                                                                                                                                                                                                                                                                                                 |
| Background/rationale         | 2       | Explain the scientific background and rationale for the investigation being reported<br><b>See particularly Introduction para 1, 4 &amp; 5</b>                                                                                                                                                                                                                                                                                                                                                                                                  |
| Objectives                   | 3       | State specific objectives, including any prespecified hypotheses<br><b>See last line of Introduction</b>                                                                                                                                                                                                                                                                                                                                                                                                                                        |
| <b>Methods</b>               |         |                                                                                                                                                                                                                                                                                                                                                                                                                                                                                                                                                 |
| Study design                 | 4       | Present key elements of study design early in the paper<br><b>Design elements are clearly outlined in the Methods section</b>                                                                                                                                                                                                                                                                                                                                                                                                                   |
| Setting                      | 5       | Describe the setting, locations, and relevant dates, including periods of recruitment, exposure, follow-up, and data collection<br><b>See Methods Para 1, also Sampling subsection para 3.</b>                                                                                                                                                                                                                                                                                                                                                  |
| Participants                 | 6       | (a) Give the eligibility criteria, and the sources and methods of selection of participants<br><b>See Sampling subsection para 1-3</b>                                                                                                                                                                                                                                                                                                                                                                                                          |
| Variables                    | 7       | Clearly define all outcomes, exposures, predictors, potential confounders, and effect modifiers. Give diagnostic criteria, if applicable<br><b>See Measures subsection</b>                                                                                                                                                                                                                                                                                                                                                                      |
| Data sources/<br>measurement | 8*      | For each variable of interest, give sources of data and details of methods of assessment (measurement). Describe comparability of assessment methods if there is more than one group<br><b>See Measures Subsection</b>                                                                                                                                                                                                                                                                                                                          |
| Bias                         | 9       | Describe any efforts to address potential sources of bias<br><b>Due to the use of secondary data and simple cross-tabulations we could not adjust models or adapt the sampling frame to address potential sources of bias. We do stratify the cross-tabulations to assess confounding and discuss potential data issues within the Discussion section.</b>                                                                                                                                                                                      |
| Study size                   | 10      | Explain how the study size was arrived at<br><b>See Sampling subsection (3<sup>rd</sup> para) and Measures subsection (1<sup>st</sup> para)</b>                                                                                                                                                                                                                                                                                                                                                                                                 |
| Quantitative variables       | 11      | Explain how quantitative variables were handled in the analyses. If applicable, describe which groupings were chosen and why<br><b>See Data preparation and Statistical Analysis subsections</b>                                                                                                                                                                                                                                                                                                                                                |
| Statistical methods          | 12      | (a) Describe all statistical methods, including those used to control for confounding<br><b>See Statistical Analysis subsection</b><br>(b) Describe any methods used to examine subgroups and interactions<br><b>See statistical analysis subsection – additional 2x2 cross-tabulations stratified by region, community and climatic variables</b><br>(c) Explain how missing data were addressed<br><b>Each cross-tabulation used only complete data</b><br>(d) If applicable, describe analytical methods taking account of sampling strategy |



|                          |     |                                                                                                                                                                                                                                                                                                                                                                                                                                                                                                               |
|--------------------------|-----|---------------------------------------------------------------------------------------------------------------------------------------------------------------------------------------------------------------------------------------------------------------------------------------------------------------------------------------------------------------------------------------------------------------------------------------------------------------------------------------------------------------|
|                          |     | NA                                                                                                                                                                                                                                                                                                                                                                                                                                                                                                            |
|                          |     | (e) Describe any sensitivity analyses                                                                                                                                                                                                                                                                                                                                                                                                                                                                         |
|                          |     | NA                                                                                                                                                                                                                                                                                                                                                                                                                                                                                                            |
| <b>Results</b>           |     |                                                                                                                                                                                                                                                                                                                                                                                                                                                                                                               |
| Participants             | 13* | (a) Report numbers of individuals at each stage of study—eg numbers potentially eligible, examined for eligibility, confirmed eligible, included in the study, completing follow-up, and analysed<br><b>See Sampling subsection (3<sup>rd</sup> para) and Measures subsection (1<sup>st</sup> para), but also note the n=56 mainland communities for the Geographic Connectivity variable</b><br>(b) Give reasons for non-participation at each stage<br>NA<br>(c) Consider use of a flow diagram<br>NA       |
| Descriptive data         | 14* | (a) Give characteristics of study participants (eg demographic, clinical, social) and information on exposures and potential confounders<br><b>See Table 1 for demographics and potential confounders</b><br>(b) Indicate number of participants with missing data for each variable of interest<br><b>Numbers of audit records with missing data are clearly described. Number of communities lacking geographic connectivity information is provided in the Measures section.</b>                           |
| Outcome data             | 15* | Report numbers of outcome events or summary measures<br><b>Descriptive statistics are provided in Table 1</b>                                                                                                                                                                                                                                                                                                                                                                                                 |
| Main results             | 16  | (a) Give unadjusted estimates and, if applicable, confounder-adjusted estimates and their precision (eg, 95% confidence interval). Make clear which confounders were adjusted for and why they were included<br><b>See Table 2 and results text</b><br>(b) Report category boundaries when continuous variables were categorized<br><b>See Data preparation subsection, Methods</b><br>(c) If relevant, consider translating estimates of relative risk into absolute risk for a meaningful time period<br>NA |
| Other analyses           | 17  | Report other analyses done—eg analyses of subgroups and interactions, and sensitivity analyses<br>NA                                                                                                                                                                                                                                                                                                                                                                                                          |
| <b>Discussion</b>        |     |                                                                                                                                                                                                                                                                                                                                                                                                                                                                                                               |
| Key results              | 18  | Summarise key results with reference to study objectives<br><b>See discussion Para 1 and Conclusion</b>                                                                                                                                                                                                                                                                                                                                                                                                       |
| Limitations              | 19  | Discuss limitations of the study, taking into account sources of potential bias or imprecision. Discuss both direction and magnitude of any potential bias<br><b>See Discussion para 2 and 9</b>                                                                                                                                                                                                                                                                                                              |
| Interpretation           | 20  | Give a cautious overall interpretation of results considering objectives, limitations, multiplicity of analyses, results from similar studies, and other relevant evidence<br><b>See Discussion</b>                                                                                                                                                                                                                                                                                                           |
| Generalisability         | 21  | Discuss the generalisability (external validity) of the study results<br><b>See Discussion</b>                                                                                                                                                                                                                                                                                                                                                                                                                |
| <b>Other information</b> |     |                                                                                                                                                                                                                                                                                                                                                                                                                                                                                                               |
| Funding                  | 22  | Give the source of funding and the role of the funders for the present study and, if                                                                                                                                                                                                                                                                                                                                                                                                                          |

---

applicable, for the original study on which the present article is based

**See Funding section**

---

\*Give information separately for exposed and unexposed groups.

**Note:** An Explanation and Elaboration article discusses each checklist item and gives methodological background and published examples of transparent reporting. The STROBE checklist is best used in conjunction with this article (freely available on the Web sites of PLoS Medicine at <http://www.plosmedicine.org/>, Annals of Internal Medicine at <http://www.annals.org/>, and Epidemiology at <http://www.epidem.com/>). Information on the STROBE Initiative is available at [www.strobe-statement.org](http://www.strobe-statement.org).

For peer review only



# BMJ Open

## Climatic and community sociodemographic factors associated with remote Indigenous Australian smoking rates – an ecological study of health audit data

|                                 |                                                                                                                                                                                                                                                                                                                                                                                                                                              |
|---------------------------------|----------------------------------------------------------------------------------------------------------------------------------------------------------------------------------------------------------------------------------------------------------------------------------------------------------------------------------------------------------------------------------------------------------------------------------------------|
| Journal:                        | <i>BMJ Open</i>                                                                                                                                                                                                                                                                                                                                                                                                                              |
| Manuscript ID                   | bmjopen-2019-032173.R1                                                                                                                                                                                                                                                                                                                                                                                                                       |
| Article Type:                   | Research                                                                                                                                                                                                                                                                                                                                                                                                                                     |
| Date Submitted by the Author:   | 07-Jun-2019                                                                                                                                                                                                                                                                                                                                                                                                                                  |
| Complete List of Authors:       | Carroll, Suzanne; University of Canberra, Centre for Research and Action in Public Health, Health Research Institute<br>Dale, Michael; University of Canberra, Centre for Research and Action in Public Health, Health Research Institute<br>Baillie, Ross; The University of Sydney, University Centre for Rural Health<br>Daniel, Mark; University of Canberra, Centre for Research and Action in Public Health, Health Research Institute |
| <b>Primary Subject Heading</b>: | Smoking and tobacco                                                                                                                                                                                                                                                                                                                                                                                                                          |
| Secondary Subject Heading:      | Epidemiology, Public health                                                                                                                                                                                                                                                                                                                                                                                                                  |
| Keywords:                       | EPIDEMIOLOGY, PUBLIC HEALTH, AUDIT                                                                                                                                                                                                                                                                                                                                                                                                           |
|                                 |                                                                                                                                                                                                                                                                                                                                                                                                                                              |

SCHOLARONE™  
Manuscripts

1  
2  
3 **Climatic and community sociodemographic factors associated with remote Indigenous**  
4 **Australian smoking rates – an ecological study of health audit data**  
5  
6

7 **Authors:**  
8

9 Suzanne J Carroll<sup>a</sup>, Michael J Dale<sup>a</sup>, Ross Bailie<sup>b</sup>, Mark Daniel<sup>a, c \*</sup>  
10

11 <sup>a</sup> Centre for Research and Action in Public Health, Health Research Institute, University of  
12 Canberra, Canberra, Australia  
13

14 <sup>b</sup> University Centre for Rural Health, School of Rural Health, University of Sydney, Lismore,  
15 Australia  
16

17 <sup>c</sup> Department of Medicine, St. Vincent's Hospital, The University of Melbourne, Fitzroy,  
18 Australia  
19  
20  
21  
22

23  
24 \* Corresponding Author  
25

26 Professor Mark Daniel  
27

28  
29 Postal address: Room 22B35, Centre for Research and Action in Public Health, Health  
30 Research Institute, University of Canberra, Locked Bag 1 University of Canberra ACT 2601  
31 Australia.  
32

33  
34 Ph +61 2 6206 8532  
35

36 email [mark.daniel@canberra.edu.au](mailto:mark.daniel@canberra.edu.au)  
37

38 **Word Count:3718**  
39  
40  
41  
42  
43  
44  
45  
46  
47  
48  
49  
50  
51  
52  
53  
54  
55  
56  
57  
58  
59  
60

## ABSTRACT

Australian Indigenous smoking rates are highest in remote communities but likely vary between communities; few studies have assessed community features in relation to Indigenous smoking rates. **Design and Objective:** This ecological study evaluated the associations between smoking rates, and community sociodemographic and climatic characteristics for a large sample of remote Indigenous communities. **Setting and sample:** Records (n=2689) from an audit of community health centres in the Northern Territory and Queensland were used to estimate smoking rates dichotomised at the median for 70 predominantly Indigenous remote communities. Community characteristics were similarly dichotomised. **Methods:** Cross-tabulations were used to calculate the odds of a community classified as high for a sociodemographic or climatic factor also being high for smoking rate. Additional cross-tabulations, stratified by sociodemographic, region (coastal or central), and geographic connectivity levels, were performed to assess potential confounding. **Results:** Community smoking rates ranged from 25-96% (median 60.2%). Moderately strong relationships were observed between community smoking rate and population size (OR 6.25, [95% CI 2.18-17.95]), education level (OR 3.67 [1.35-10.01]), income (2.86 [1.07-7.67]), and heat (2.86 [1.07-7.67]). **Conclusions:** Smoking rates in Australian remote Indigenous communities are universally high. Smoking rates are associated with greater community-level socioeconomic status and size, most likely reflecting greater means of accessing tobacco with mass of smokers sufficient to sustain a normative influence. Severe heat was also associated with high smoking rates suggesting such a stressor might support smoking as a coping mechanism. Community sociodemographic and climatic factors bear consideration as context-level correlates of community smoking rates.

**Strengths and Limitations:**

This study contributes to the limited literature on smoking rates in remote Australian Indigenous communities which thus far has been based on considerably smaller samples of communities.

This study is unique in estimating ecological associations between smoking rates and relevant community-level sociodemographic, geographic and climatic factors.

Community smoking rates derived from health service data were linked with census, geographic connectivity, and climatic information.

Sample loss due to missing smoking information most likely indicates random deficiencies in health assessment at the local level, thus biasing results towards the null.

Study results are generalisable to Australian remote Indigenous communities and may be broadly generalisable to remote-dwelling indigenous populations in other developed countries.

## INTRODUCTION

Tobacco smoking is a major risk factor for a range of chronic health conditions including cardiovascular disease, type 2 diabetes and cancer<sup>1, 2</sup>. Indigenous populations worldwide have higher smoking rates than non-Indigenous populations. Disparities in smoking prevalence are apparent in New Zealand (Maori 35.5%; New Zealand adults 14.2%), the US (American Indians/Alaska Natives 29.2%; US adults 16.8%), and Canada (First Nations, off-reserve 26.8%; Inuit 48.9%; Canadian non-Aboriginal population 15.1%)<sup>3-5</sup>. In Australia, Aboriginal and Torres Strait Islander peoples (hereafter Indigenous Australians) are 2.7 times as likely to smoke daily as non-Indigenous Australians, with age-standardised prevalence rates of 42% and 15%, respectively<sup>6</sup>. Tobacco-related conditions are estimated to account for half of the health gap between Indigenous and non-Indigenous Australians<sup>7</sup>.

Greater smoking in Indigenous Australians has been attributed to socioeconomic factors (low income, financial stress, unemployment, low education, and housing [rental versus ownership, overcrowding]); sociocultural factors (smoking exposure and normalisation); social factors (boredom, or being: arrested; incarcerated; removed from family [or removal of a relative]; a victim of violence or threats); and stress, including stress associated with a history of colonisation and dispossession (racism, marginalisation, family dislocation, disconnection from the land, loss of traditional diet and lifestyle and the adoption of Western habits and practices)<sup>8-10</sup>.

Adult Indigenous Australian smoking rates vary from 39% in Major Cities to 49% in Remote and 56% in Very Remote areas<sup>11, 12</sup>. This is unsurprising given smoking varies by social disadvantage<sup>9</sup> and, in Australia, social inclusion and socioeconomic status (SES) lessen with

1  
2  
3 distance from major metropolitan areas<sup>13</sup>. Thus, it is reasonable to anticipate greater  
4  
5 smoking amongst Indigenous Australians in more remote regions.  
6  
7

8  
9 Smoking rates also differ between remote Indigenous communities with one study reporting  
10  
11 rates ranging from 59% to 80%<sup>14</sup>. This variation may be driven by community-specific  
12  
13 factors. In research not focused on Indigenous communities, factors such as neighbourhood  
14  
15 disadvantage, perceived crime and neighbourhood stress, and perceived acceptability of  
16  
17 smoking have been linked to greater likelihood of an individual smoking<sup>15-17</sup>. Thus, variation  
18  
19 in community exposures may shape differences in smoking behaviours between remote  
20  
21 Indigenous communities, yielding differences in consequent disease outcomes. Specific to  
22  
23 Indigenous smoking, geographic variation in smoking rates (i.e., generally higher smoking  
24  
25 rates in northern coastal regions) has been attributed to historical factors, with smoking  
26  
27 behaviour introduced across the northern coastal region of Australia by Macassan  
28  
29 fishermen<sup>10, 18</sup> beginning around 1780<sup>19</sup>. Minimal research has investigated differences  
30  
31 between Indigenous communities, despite geographic variations in smoking rates that likely  
32  
33 reflect geographic variation in environmental predisposing factors.  
34  
35  
36  
37  
38  
39

40  
41 A further potential influence on smoking prevalence is extreme weather, which is  
42  
43 demonstrably 'more extreme' in remote Australian regions. Temperature extremes can vary  
44  
45 from 34.8-38.0°C in the Darwin (metropolitan) region, to 42.0-46.3°C in the remote Rabbit  
46  
47 Flat region<sup>20</sup>. Cigarette sales across the US demonstrate seasonality, increasing in the  
48  
49 summer months<sup>21</sup>, with this pattern also evident within smaller geographic areas (i.e.  
50  
51 within New Jersey)<sup>22</sup>. This apparent association between temperature (higher in summer  
52  
53 months) and smoking may be the result of the relationship between extreme high  
54  
55 temperatures and negative affective states, stress and violence<sup>23, 24</sup>, as stress is well  
56  
57  
58  
59  
60

1  
2  
3 accepted as being linked to smoking<sup>9, 25, 26</sup>. Extreme high temperatures may influence  
4  
5 smoking behaviour by increasing stress and anxiety levels.  
6  
7

8  
9 Tobacco use is of major significance to the health gap affecting Indigenous Australians and is  
10  
11 highest in socially disadvantaged populations in geographically remote locations. Few  
12  
13 studies have assessed community exposures in relation to Indigenous smoking behaviour.  
14  
15

16 This study assessed smoking rates for remote Indigenous communities in relation to  
17  
18 community sociodemographic and climatic factors.  
19  
20

## 21 22 **METHODS**

23  
24 This study is part of the Environments and Remote Indigenous Cardiometabolic Health  
25  
26 (EnRICH) Project which aimed to identify community features related to the cardiometabolic  
27  
28 health of Indigenous Australians living within remote communities across the Northern  
29  
30 Territory and Queensland. This study was conducted in accordance with the principles of the  
31  
32 Declaration of Helsinki. Ethics approvals were obtained from multiple Human Research  
33  
34 Ethics Committees (details in Ethics Approval section).  
35  
36  
37  
38  
39

### 40 **Sampling**

41  
42 This study used community health service records from the *One21seventy* program,  
43  
44 applying protocols for auditing of preventive healthcare developed by the Audit and Best  
45  
46 Practice for Chronic Disease (ABCD) Project<sup>27</sup>. The ABCD Audit Protocols defines community  
47  
48 health service client records eligible for audit via the following criteria: 1) aged between 15  
49  
50 and 54 years; 2) a community resident for  $\geq 6$  months per last 12 months; 3) not previously  
51  
52 diagnosed with diabetes, cardiovascular disease or chronic kidney disease; and 4) not  
53  
54 pregnant or  $< 6$  weeks postpartum. The audit sample was drawn from the identified eligible  
55  
56 client records with sample size determined according to program recommendations<sup>27</sup>.  
57  
58  
59  
60

1  
2  
3 Where there were more than 30 eligible records, records were randomly sampled with the  
4  
5 size of the sample determined by a sliding scale based on the number of eligible records.  
6  
7

8 Where the number of eligible client records was 30 or less, all records were sampled.  
9

10  
11 The current study accessed audit data according to the following inclusion criteria, the  
12  
13 community was: (1) located within the Northern Territory or Queensland; (2) a 'remote'  
14  
15 location<sup>28</sup>; and (3) a predominantly Indigenous community signed up to the ABCD National  
16  
17 Research Partnership. Such communities were assigned a unique spatial identifier, allowing  
18  
19 linkage with other datasets including ABS Census data expressed for Indigenous Locations  
20  
21 (ILOCs)<sup>28</sup>. ILOCs are the smallest resolution at which Indigenous Census data are available,  
22  
23 typically representing small (minimum 90 persons) Indigenous communities. Some (n=3)  
24  
25 ILOCs include multiple nearby and associated very small communities. Communities  
26  
27 belonging to such ILOCs were excluded from this study. Seventy communities met the above  
28  
29 inclusion criteria and were included in this study.  
30  
31  
32  
33  
34  
35

36 Audit data for the years 2010-2014 were extracted for each community (total n=8561  
37  
38 records). Audit records were assessed for multiple client coverage using date of birth and  
39  
40 sex, with the most recent record retained (n=5412). Records were excluded where the  
41  
42 clients identified as 'Neither' an Aboriginal and/or Torres Strait Islander person (n=337) and  
43  
44 clients whose last health centre attendance was prior to 1 January 2010 (n=395), leaving  
45  
46 4680 records remaining. Audit data were aggregated by community.  
47  
48  
49  
50

### 51 **Patient and Public Involvement**

52

53  
54 Due to the reliance of this study on audit data of health service record, patients and the  
55  
56 public were not involved in the design or execution of this research. However, sampled  
57  
58  
59  
60



1  
2  
3 communities were extensively consulted and voluntarily participated in the *One21Seventy*  
4  
5 program from which health record audit data were sourced.  
6  
7

## 8 9 **Measures**

### 10 11 **Dependent variable**

12  
13 Community smoking rates were calculated from audit records. For each community,  
14  
15 smoking rate was calculated as the count of clinical records documenting status as 'smoker'  
16  
17 divided by the total records with a valid smoking status (i.e., sum of 'smoker' and 'non-  
18  
19 smoker'). Where smoking status was not recorded (i.e., 'no record' or 'not applicable') the  
20  
21 audit record was excluded (n=1991), leaving a final sample of 2689 records of Indigenous  
22  
23  
24  
25  
26  
27  
28  
29  
30  
31  
32  
33  
34  
35  
36  
37  
38  
39  
40  
41  
42  
43  
44  
45  
46  
47  
48  
49  
50  
51  
52  
53  
54  
55  
56  
57  
58  
59  
60  
Australians with an identifiable smoking status.

### 30 31 **Independent variables**

32  
33 Community-level Indigenous sociodemographic data were extracted from the ABS 2011  
34  
35 Population and Housing Census<sup>29</sup> and expressed at the ILOC spatial unit<sup>28</sup>. Data included:  
36  
37 *population size* (all persons); *count of Aboriginal and Torres Strait Islander persons*; *age*  
38  
39 (median); *overcrowding* (the percentage of dwellings requiring one or more additional  
40  
41 bedrooms based on household demographics); and *income* (median household).

42  
43 Proportions of Indigenous persons were calculated from the Census data for *education*  
44  
45 (grade 10 schooling or higher) and *employment* (aged 15 years and over in labour force).  
46  
47

48  
49  
50  
51  
52  
53  
54  
55  
56  
57  
58  
59  
60  
*Geographic connectivity* was expressed as a count of other Indigenous communities within a  
250km road-network distance<sup>30</sup> (mainland communities only; n=56).

Climate profiles were obtained from surface maps sourced from the Australian Bureau of  
Meteorology for the period 1961-2012<sup>31</sup>. Community-level climate measures representing

1  
2  
3 *heat* and *heavy rain* were determined as follows. Heat was operationalised as the average of  
4  
5 the annual sum of 'cooling degree.days' in each community. 'Cooling degree.days' is a  
6  
7 standard measure<sup>32</sup> defined as the number of degrees by which a day's mean temperature  
8  
9 exceeds 18°C. For example, a day with a mean daily temperature of 25°C would attract a  
10  
11 cooling degree.days score of 7 degree.days, whereas a day with a mean daily temperature  
12  
13 of 16°C would attract a score of 0 degree.days. *Heavy Rain* was operationalised as the mean  
14  
15 of the annual number of days with greater than 25 millimetres of precipitation.  
16  
17

18  
19  
20  
21 *Region* was determined according to the community geographic location within Australian  
22  
23 Bureau of Meteorology Climate Zones<sup>33</sup>, with the climate zones 'Equatorial' and 'Tropical'  
24  
25 collapsed to form the 'Coastal' Region, and the climate zones 'Desert' and 'Grassland'  
26  
27 collapsed to form the 'Central' Region. Of the 70 included remote communities, 43 were  
28  
29 classified as Coastal and 27 as Central.  
30  
31  
32  
33  
34  
35  
36

### 37 **Data preparation**

38  
39 Communities were classified as "high" or "low" based on the median community value for  
40  
41 each variable except Region (classification defined above) (Table 1). Alternative cut points  
42  
43 were considered, such as the 25<sup>th</sup> and 75<sup>th</sup> percentiles, however, use of other cut points  
44  
45 resulted in very small cell sizes, particularly within stratified cross-tabulations, such that  
46  
47 some cells included zero counts.  
48  
49  
50  
51

### 52 **Statistical analysis**

53  
54 Odds ratios (ORs) were calculated by two-by-two cross-tabulations of counts of  
55  
56 communities classified as high or low smoking rate and counts of communities with high or  
57  
58 low classifications of sociodemographic and climatic variables. Additional two-by-two cross-  
59  
60

tabulations stratified by community-level measures (sociodemographic measures, geographic connectivity, and region) were conducted to assess potential confounding.

Where the stratified groups were homogeneous (Breslow-Day test of homogeneity of ORs), adjusted pooled ORs were calculated using the mid-*p* method. Due to small counts within cells, 'exact' options (mid-*p* and mid-*p* 95% confidence intervals) were used throughout<sup>34</sup>.

All data preparation and analyses were conducted in SAS (version 9.4, SAS Institute Inc, Cary, North Carolina) and WinPepi (Compare2, version 3.85, J. Abramson).

## RESULTS

Features of communities are described in Table 1. Median population size was 332. Median population proportion identifying as Indigenous (i.e. Aboriginal and/or Torres Strait Islander) was 90.7%. Median smoking rate was 60.2% with a large range (25.0% - 96.0%).

**Table 1: Features of communities sampled (n=70)**

| Community feature                                                                   | Mean   | Median | IQR            | Min    | Max     |
|-------------------------------------------------------------------------------------|--------|--------|----------------|--------|---------|
| Population size (Count of total persons <sup>a</sup> )                              | 522.9  | 331.5  | 210.0-686.0    | 111    | 2124    |
| Indigenous persons (as proportion of total persons <sup>a</sup> ; %)                | 87.8   | 90.7   | 88.0-94.0      | 52.2   | 100.0   |
| Indigenous persons:                                                                 |        |        |                |        |         |
| Proportion who are smokers (% of audited records)                                   | 59.5   | 60.2   | 50.0-70.0      | 25.0   | 96.0    |
| Age (median <sup>a</sup> ; years)                                                   | 23.0   | 22.0   | 20.0-25.0      | 16.0   | 31.0    |
| Income (median household <sup>a</sup> ; AUD/week)                                   | 952.41 | 912.00 | 722.00-1125.00 | 312.00 | 2111.00 |
| Education (proportion with Year 10 schooling or greater <sup>a</sup> ; %)           | 55.3   | 58.2   | 36.8-73.1      | 9.4    | 85.2    |
| Employment (proportion in labour force <sup>a</sup> ; %)                            | 38.3   | 34.6   | 27.6-52.0      | 10.7   | 73.5    |
| Overcrowding (proportion of households requiring additional bedrooms <sup>a</sup> ) | 44.8   | 43.1   | 31.1-60.0      | 11.6   | 84.4    |

|                                                                                                            |        |        |           |        |        |
|------------------------------------------------------------------------------------------------------------|--------|--------|-----------|--------|--------|
| Geographic connectivity (count of Indigenous communities within 250km <sup>b</sup> -road network distance) | 10.8   | 6.0    | 4.0-14.0  | 2.0    | 39.0   |
| Heat (average annual cooling degree.days) <sup>c</sup>                                                     | 2908.5 | 3178.0 | 2293-3353 | 1678.0 | 3644.0 |
| Heavy Rain (average annual number of days with greater than 25 millimetres of precipitation, days/year)    | 14.4   | 15.7   | 4.2-24.4  | 2.4    | 25.6   |

<sup>a</sup>data relate to the ILOC associated with the selected community; <sup>b</sup>n=56 [mainland communities only]; <sup>c</sup> Heat, cooling degree.days is calculated as the average of the annual sum of the number of degrees by which each day's mean temperature exceeds 18°C.; AUD – Australian Dollars; ILOC – Indigenous Locations

Table 2 reports the results of the two-by-two (presented highest to lowest magnitude of OR) and stratified two-by-two cross-tabulations. Relatively high population communities were more likely to have high smoking rates (OR 6.25, [95% CI 2.18-17.95],  $p < 0.001$ ) compared to communities with low population size. Stratification into high and low conditions for sociodemographic measures and geographic connectivity revealed no differences in ORs between conditions (Breslow-Day test of homogeneity  $p > 0.05$ ) and pooled ORs remained moderately large (ORs ranging from 5.35-6.88,  $p$ -values  $< 0.01$  or smaller) though with greater attenuation when accounting for region (OR 4.43 [1.47-13.92],  $p < 0.01$ ).

High education communities were more likely to have high smoking rates (OR 3.67 [1.35-10.01],  $p = 0.010$ ) than communities with low education. Stratification by geographic connectivity and employment revealed differences in ORs between the high and low conditions. Amongst communities with high geographic connectivity, high community-level education was associated with high smoking rates (OR  $\infty$  [2.68- $\infty$ ],  $p = 0.002$ ). This relationship was not statistically significant among communities with low geographic connectivity. Similarly, amongst communities with low employment, the odds of high education communities being high in smoking rate rose strongly (OR 26.67 [3.03-621.30],  $p < 0.001$ ) while there was no statistically significant association with the high employment condition. Pooled ORs for high education communities being high in smoking rate, after

1  
2  
3 accounting for other measures, were small to moderate (OR 3.47 to 6.45,  $p < 0.05$  or  
4 smaller), except when accounting for region when the association became null. This reflects  
5  
6 the differing directions of associations between regions though the difference between  
7  
8 groups did not quite reach statistical significance (Breslow-Day test of homogeneity  
9  
10  $p=0.066$ ).

11  
12  
13  
14  
15  
16 Communities with frequent heavy rain were more likely to have high smoking rates (OR 3.67  
17 [1.35-10.01],  $p=0.010$ ). These odds were greater for communities with an older population  
18 (OR 18.20 [2.96-139.00],  $p < 0.001$ ) or low education (OR 10.50 [1.61-84.86],  $p=0.006$ ) while  
19  
20 the odds became non-significant for communities with a younger population or high  
21  
22 education. Pooled ORs remained of small to moderate strength when accounting for  
23  
24 household income (OR 3.51 [1.28-10.05]  $p=0.014$ ), employment (OR 3.12 [1.03-9.89],  
25  
26  $p=0.043$ ), overcrowding (OR 4.67 [1.51-16.28]  $p=0.007$ ), and geographic connectivity (OR  
27  
28 7.45 [1.86-33.39]  $p=0.004$ ). However, upon accounting for population size the odds of  
29  
30 communities with frequent heavy rain being high in smoking rate were non-significant.  
31  
32  
33  
34  
35  
36  
37  
38  
39  
40  
41  
42  
43  
44  
45  
46  
47  
48  
49  
50  
51  
52  
53  
54  
55  
56  
57  
58  
59  
60  
When stratifying by region, no central communities were classified as having frequent heavy  
rain and the association between frequent heavy rain and smoking was null for the coastal  
communities.

Community income was associated with smoking rate (OR 2.86 [1.07-7.67],  $p=0.036$ ).  
Stratification into high and low conditions for sociodemographic measures and geographic  
connectivity revealed no differences in ORs between groups, and pooled ORs were small to  
moderate (range 2.31-3.75) but were not statistically significant when accounting for  
population size, geographic connectivity, or region.

1  
2  
3 Heat was also associated with community smoking rate (OR 2.86 [1.07-7.67],  $p=0.036$ ) and  
4 the odds of a hotter climate community being high in smoking rose notably under the  
5  
6 following conditions: low education (OR 13.33 [2.30-79.93],  $p=0.001$ ); low employment (OR  
7  
8 12.67 [2.06-98.54]  $p=0.004$ ), high overcrowding (OR 9.17 [1.82-50.20],  $p=0.004$ ), high  
9  
10 connectivity (OR  $\infty$  [5.44- $\infty$ ]  $p<0.001$ ), and central region (OR  $\infty$  [2.61- $\infty$ ],  $p<0.01$ ). Amongst  
11  
12 coastal communities, high heat was associated with a lesser likelihood of being a high  
13  
14 smoking community (OR 0.15 [0.01-1.07],  $p<0.05$ ). Pooled ORs were small to moderate  
15  
16 when accounting for average population age (OR 3.80 [1.31-12.04]  $p=0.013$ ), and income  
17  
18 (OR 2.90 [1.07-8.23]  $p=0.036$ ) but there was no statistically significant association when  
19  
20 accounting for population size.  
21  
22  
23  
24  
25  
26  
27

28 Community employment was not associated with smoking rate (OR 2.25 [0.85-5.94],  
29  
30  $p=0.103$ ) but under the low community education condition the odds of high employment  
31  
32 communities being high in smoking rose substantially (OR 6.67 [1.20-39.16],  $p=0.026$ ).  
33  
34 Stratifying by location revealed ORs differing in directions. Amongst coastal communities,  
35  
36 high employment rate was inversely associated with smoking rate (OR 0.32 [0.04-1.63])  
37  
38 while amongst central communities, high employment was directly associated with high  
39  
40 smoking rate (OR 4.75 [0.37-53.66]). These region-specific associations, however, did not  
41  
42 reach statistical significance. Pooled ORs accounting for other sociodemographic measures  
43  
44 or geographic connectivity yielded small but statistically non-significant effects (ORs ranging  
45  
46 from 2.05-2.88).  
47  
48  
49  
50  
51  
52  
53  
54  
55  
56  
57  
58  
59  
60

**Table 2: Associations between counts of communities with high levels of sociodemographic and climatic features, and high smoking proportion, accounting for potential confounders (n=70, 95% CIs calculated using exact methods [mid-p])**

| Exposure           | OR (95% CI)          | Stratifying variable                 | OR (95% CI)<br>(high condition or<br>coastal region) | OR (95% CI)<br>(low condition or<br>central region) | Breslow-Day<br>test of<br>homogeneity | Pooled OR (95% CI)   |
|--------------------|----------------------|--------------------------------------|------------------------------------------------------|-----------------------------------------------------|---------------------------------------|----------------------|
| Population<br>size | 6.25 (2.18-17.95)*** | Age                                  | 18.20 (2.96-139.00)***                               | 3.30 (0.80-13.92)                                   | 0.134                                 | 6.44 (2.27-19.81)*** |
|                    |                      | Income                               | 4.27 (0.95-19.29)                                    | 7.65 (1.56-38.03)**                                 | 0.589                                 | 5.35 (1.90-15.95)**  |
|                    |                      | Education                            | 8.50 (1.65-47.26)*                                   | 4.57 (0.98-21.87)                                   | 0.578                                 | 5.81 (2.01-18.11)**  |
|                    |                      | Employment                           | 4.06 (0.92-18.84)                                    | 15.00 (2.55-113.26)**                               | 0.258                                 | 6.88 (2.36-22.19)*** |
|                    |                      | Overcrowding                         | 5.11 (1.14-23.81)*                                   | 9.33 (1.86-50.93)**                                 | 0.584                                 | 6.41 (2.26-19.72)*** |
|                    |                      | Geographic connectivity <sup>a</sup> | 2.92 (0.53-15.91)                                    | 16.00 (1.98-141.91)**                               | 0.192                                 | 5.66 (1.67-20.72)**  |
|                    |                      | Region                               | 5.66 (1.36-23.67)*                                   | 3.20 (0.41-23.38)                                   | 0.633                                 | 4.43 (1.47-13.92)**  |
| Education          | 3.67 (1.35-10.01)*   | Population size                      | 4.96 (0.97-27.80)*                                   | 2.67 (0.56-13.04)                                   | 0.578                                 | 3.47 (1.18-10.79)*   |
|                    |                      | Age                                  | 3.78 (0.85 – 17.67)                                  | 4.50 (1.03-20.58)*                                  | 0.868                                 | 3.96 (1.45-11.51)**  |
|                    |                      | Income                               | 4.81 (1.01-25.98)                                    | 4.81 (1.01-25.98)                                   | 1.000                                 | 4.59 (1.59-14.62)**  |
|                    |                      | Employment                           | 0.68 (0.12-3.43)                                     | 26.67 (3.03-621.30)***                              | 0.005                                 | -                    |
|                    |                      | Overcrowding                         | 4.36 (0.73-34.91)                                    | 11.90 (1.44-284.38)*                                | 0.485                                 | 6.45 (1.75-30.92)**  |
|                    |                      | Geographic connectivity <sup>a</sup> | ∞ (2.68-∞)**                                         | 1.00 (0.16-5.69)                                    | 0.016                                 | -                    |
|                    |                      | Region                               | 0.72 (0.13-3.25)                                     | 10.00 (0.56-307.27)                                 | 0.066                                 | 1.37 (0.36-4.86)     |
| Heavy Rain         | 3.67 (1.35-10.01)*   | Population size                      | 4.75 (0.93-24.21)*                                   | 1.42 (0.28-6.70)                                    | 0.274                                 | 2.50 (0.85-7.44)     |
|                    |                      | Age                                  | 18.20 (2.96-139.00)***                               | 1.29 (0.33-5.02)                                    | 0.016                                 | -                    |
|                    |                      | Income                               | 4.82 (1.06-22.78)*                                   | 2.80 (0.65-12.18)                                   | 0.603                                 | 3.51 (1.28-10.05)*   |
|                    |                      | Education                            | 0.57 (0.07-3.34)                                     | 10.50 (1.61-84.86)**                                | 0.020                                 | -                    |
|                    |                      | Employment                           | 1.28 (0.25-6.25)                                     | 9.50 (1.55-74.66)*                                  | 0.089                                 | 3.12 (1.03-9.89)*    |

1  
2  
3  
4  
5  
6  
7  
8  
9  
10  
11  
12  
13  
14  
15  
16  
17  
18  
19  
20  
21  
22  
23  
24  
25  
26  
27  
28  
29  
30  
31  
32  
33  
34  
35  
36  
37  
38  
39  
40  
41  
42  
43  
44  
45  
46

|            |                   |                                      |                      |                      |         |                     |
|------------|-------------------|--------------------------------------|----------------------|----------------------|---------|---------------------|
|            |                   | Overcrowding                         | 7.11 (1.24-58-4.83)* | 3.50 (0.71-19.50)    | 0.553   | 4.67 (1.51-16.28)** |
|            |                   | Geographic connectivity <sup>a</sup> | ∞ (2.68-∞)**         | 3.25 (0.56-18.53)    | 0.091   | 7.25 (1.86-33.39)** |
|            |                   | Region                               | 0.64 (0.08-3.59)     | NO DATA              | NO DATA | -                   |
| Income     | 2.86 (1.07-7.67)* | Population size                      | 1.78 (0.37-8.28)     | 3.19 (0.66-15.71)    | 0.589   | 2.31 (0.80-6.83)    |
|            |                   | Age                                  | 2.57 (0.61-10.81)    | 3.10 (0.76-12.67)    | 0.852   | 2.74 (1.04-7.43)*   |
|            |                   | Education                            | 3.90 (0.82-21.18)    | 3.90 (0.82-21.18)    | 1.000   | 3.75 (1.29-11.93)*  |
|            |                   | Employment                           | 3.60 (0.84-15.69)    | 2.17 (0.52-8.97)     | 0.615   | 2.70 (1.01-7.41)*   |
|            |                   | Overcrowding                         | 2.60 (0.59-12.18)    | 4.67 (0.97-25.35)    | 0.589   | 3.33 (1.18-10.07)*  |
|            |                   | Geographic connectivity <sup>a</sup> | 2.75 (0.56-14.03)    | 3.14 (0.56-19.17)    | 0.909   | 2.81 (0.91-9.16)    |
|            |                   | Region                               | 2.18 (0.57-8.34)     | 4.00 (0.54-35.79)    | 0.608   | 2.58 (0.89-7.80)    |
| Heat       | 2.86 (1.07-7.67)* | Population size                      | 1.50 (0.32-6.94)     | 4.96 (0.97-27.80)*   | 0.277   | 2.59 (0.90-7.77)    |
|            |                   | Age                                  | 7.22 (1.28-55.09)*   | 2.45 (0.57-11.30)    | 0.344   | 3.80 (1.31-12.04)*  |
|            |                   | Income                               | 2.31 (0.55-9.97)     | 3.94 (0.88-18.40)    | 0.606   | 2.90 (1.07-8.23)*   |
|            |                   | Education                            | 0.31 (0.04-1.72)     | 13.33 (2.30-79.93)** | 0.001   | -                   |
|            |                   | Employment                           | 0.55 (0.10-2.66)     | 12.67 (2.06-98.54)** | 0.007   | -                   |
|            |                   | Overcrowding                         | 9.17 (1.82-50.20)**  | 1.10 (0.27-4.43)     | 0.043   | -                   |
|            |                   | Geographic connectivity <sup>a</sup> | ∞ (5.44 - ∞)***      | 0.80 (0.15-4.25)     | 0.002   | -                   |
|            |                   | Region                               | 0.15 (0.01-1.07)*    | ∞ (2.61-∞)**         | <0.001  | -                   |
| Employment | 2.25 (0.85-5.94)  | Population size                      | 1.63 (0.35-7.91)     | 6.00 (1.06-46.31)*   | 0.258   | 2.88 (0.97-9.28)    |
|            |                   | Age                                  | 2.75 (0.65-11.89)    | 2.04 (0.51-8.16)     | 0.762   | 2.30 (0.88-6.19)    |
|            |                   | Income                               | 2.80 (0.65-12.18)    | 1.69 (0.40-7.03)     | 0.615   | 2.18 (0.79-5.80)    |
|            |                   | Education                            | 0.17 (0.01-1.35)     | 6.67 (1.20-39.16)*   | 0.008   | -                   |
|            |                   | Overcrowding                         | 2.73 (0.54-15.53)    | 2.73 (0.54-15.53)    | 1.000   | 2.65 (0.87-8.66)    |
|            |                   | Geographic connectivity <sup>a</sup> | 6.67 (0.95-56.74)*   | 0.79 (0.13-4.38)     | 0.091   | 2.05 (0.61-6.91)    |



1  
2  
3  
4  
5  
6  
7  
8  
9  
10  
11  
12  
13  
14  
15  
16  
17  
18  
19  
20  
21  
22  
23  
24  
25  
26  
27  
28  
29  
30  
31  
32  
33  
34  
35  
36  
37  
38  
39  
40  
41  
42  
43  
44  
45  
46

|        |                  |                   |       |   |
|--------|------------------|-------------------|-------|---|
| Region | 0.32 (0.04-1.63) | 4.75 (0.37-53.66) | 0.040 | - |
|--------|------------------|-------------------|-------|---|

OR = Odds Ratio; CI = Confidence Interval; <sup>a</sup> n=56 (mainland communities only); \*p<0.05; \*\*p<0.01; \*\*\*p<0.001

For peer review only

## DISCUSSION

This ecological study assessed Indigenous Australian smoking rates based on health-audit records, within predominantly Indigenous remote communities, in relation to community-level sociodemographic and climatic factors. We observed substantial variation in Indigenous smoking rates between remote communities, from 25% to 96%, a broader range than previously reported. Other studies reported rates as ranging between 59% to 80%<sup>14</sup> and 27% to 68%<sup>35</sup>.

Our observed variation may be, in part, due to the large degree of sample loss resulting from audit client records missing smoking information. Wright and colleagues<sup>35</sup> noted particularly small sample sizes available for some Indigenous regions which may impact on the precision of estimates and artificially inflate the range of smoking rates reported. To better understand geographic variation in smoking rate, its associated factors, and change in rates over time, better quality data are needed. Regardless, our findings align with previously identified substantial geographic variation in smoking between remote Indigenous communities. This variation has important implications for intervention strategies, suggesting the need for localised approaches targeting communities according to smoking prevalence. It is, however, important to note that regional variation in smoking rates has a basis in the history of tobacco usage among Indigenous Australians, with exposure to smoked tobacco (in contrast to the custom of chewing native, nicotine-containing flora) preceding Western colonisation and occurring in littoral regions of the Northern Territory and Queensland via trade<sup>10</sup>. This study stratified cross-tabulations by region in order to account for this previously established variation in smoking rates.

1  
2  
3 Our findings indicate smoking rate covaries with community-level features, notably,  
4  
5 population size, education level, income, heat, and frequency of heavy rain. Some effects  
6  
7 varied given other community conditions. Communities with larger populations were more  
8  
9 likely to have high smoking rates. This may reflect greater access to cigarettes as larger  
10  
11 communities likely have more services including retail outlets for cigarettes. Relatively high-  
12  
13 income communities were also more likely to have high smoking rates, suggesting greater  
14  
15 ability to afford cigarettes. This association was nullified, however, by accounting for  
16  
17 population size, geographic connectivity, and region (itself related to both population size  
18  
19 and geographic connectivity), given that with greater population size and geographic  
20  
21 connectivity comes greater income earning opportunity.  
22  
23  
24  
25  
26  
27

28  
29 Communities with a relatively high education level were more likely to have high smoking  
30  
31 rates, particularly if the community also had low levels of employment or high geographic  
32  
33 connectivity to other Indigenous communities. The direction of this relationship is  
34  
35 unexpected, as individual-level education and area-level SES are both inversely related to  
36  
37 individual smoking in the Australian population in general, and Indigenous Australians in  
38  
39 particular<sup>36, 37</sup>. Greater education with lesser opportunity to apply that education through  
40  
41 employment could, however, constitute a substantial stressor that supports smoking as a  
42  
43 coping strategy.  
44  
45  
46  
47

48  
49 It is possible that relationships observed between community smoking rate and  
50  
51 sociodemographic features (population size and education level) reflect complex historic  
52  
53 and ongoing social pathologies. Larger communities may consist of multiple displaced, and  
54  
55 sometimes feuding, family groups forcefully relocated from their traditional homelands to a  
56  
57 mission site<sup>38</sup>. Forced removal from traditional lands breaks the important connection that  
58  
59  
60

1  
2  
3 Indigenous Australians have to Country, a connection important to their wellbeing<sup>39</sup>.

4  
5 Moreover, forced dispossession and resettlement disrupted established traditional lifestyles  
6  
7 and social systems whilst failing to provide an adequate alternate cultural system, resulting  
8  
9 in reduced quality of lifestyle<sup>40</sup>.

10  
11  
12  
13 This disruption of traditional structures and inadequate replacement with new structures,  
14  
15 and the lack of acceptance into the western social system could lead to anomie and  
16  
17 collective despondency, exacerbated by cultural bereavement<sup>41-43</sup>. It follows that such  
18  
19 communities would have higher smoking rates amongst other social problems. Indeed,  
20  
21 communities with a long history of receiving forcefully displaced groups and where  
22  
23 maximum dysfunctional cultural change has occurred are most likely to exhibit social  
24  
25 pathologies and disorder, including violence and self-harm<sup>40</sup>. We speculate that the  
26  
27 unexpected association found in this study between high education and high smoking rate,  
28  
29 particularly in communities with low employment, exemplifies the lack of social integration  
30  
31 and acceptance into western social structures and resultant coping behaviour.  
32  
33  
34  
35  
36  
37  
38

39 Relatively high community-level Western-style education may correspond to a reduced  
40  
41 reliance on traditional social structures. Yet, higher levels of education may not overcome  
42  
43 institutional racism and enable Indigenous individuals and groups to be truly accepted  
44  
45 within the broader, non-Indigenous societal structures and take advantage of related  
46  
47 opportunities. This latter point would be highlighted to the individual and the community by  
48  
49 lack of employment. Smoking rate is likely a symptom of the broader issues faced by remote  
50  
51 Indigenous communities and attempts to reduce smoking without considering these  
52  
53 broader issues are unlikely to be effective. Interventions targeting proximal individual-level  
54  
55 determinants of smoking need to be supported by efforts to improve distal community-level  
56  
57  
58  
59  
60

1  
2  
3 and societal factors<sup>44</sup>. Broad ecological approaches collaborating with local Indigenous  
4  
5 representatives to facilitate local empowerment are needed with the focus on reducing the  
6  
7 underlying social problems and ensuing social psychological states that predispose  
8  
9 individual smoking behaviours<sup>26</sup>.  
10  
11  
12

13  
14 Regarding climatic exposures, the influence of weather on smoking has rarely been  
15  
16 assessed, especially in Indigenous populations. We observed frequent heavy rain to be  
17  
18 associated with high smoking rates, particularly where community residents had a higher  
19  
20 median age. However, this relationship may be an artefact of the association between  
21  
22 region and smoking, as frequent heavy rain occurred only in the coastal region, and coastal  
23  
24 communities were more likely to be high in smoking rate. Heat was also associated with  
25  
26 high smoking rates, particularly in communities with low education, low employment, high  
27  
28 overcrowding, high geographic connectivity and central region. This supports our premise  
29  
30 regarding heat as a stressor affecting smoking behaviour, an effect seemingly compounded  
31  
32 by other adverse conditions. In particular, the strong positive relationship between high  
33  
34 heat and smoking in the central region suggests the relationship between heat and smoking  
35  
36 rate is not due to confounding by region. If stress due to ongoing, inescapable heat is indeed  
37  
38 related to smoking, as our findings suggest, this supports the need for better quality,  
39  
40 culturally appropriate housing to ameliorate such stress. It is possible, however, that the  
41  
42 apparent association between heat and smoking rate is due to other factors not measured  
43  
44 here. These associations are novel and warrant further exploration.  
45  
46  
47  
48  
49  
50  
51  
52

53  
54 This study builds on and expands the literature on Australian Indigenous smoking as few  
55  
56 studies have assessed smoking rates of remote Indigenous communities, especially in  
57  
58 relation to community-level factors. It identifies relationships between community smoking  
59  
60

1  
2  
3 rate and community features and provides a snapshot of smoking rates in remote  
4  
5 Indigenous communities. Though specific to Australian remote Indigenous communities,  
6  
7 these findings may be broadly generalisable to other remote-dwelling indigenous  
8  
9 populations in high-income countries as such populations have similar characteristics and  
10  
11 have experienced similar historical exposures. Some limitations should be noted. The cross-  
12  
13 sectional nature of this study limits inference on the temporal direction of associations. Use  
14  
15 of clinical audit data only captures information for individuals who accessed western health-  
16  
17 care services. Individual-level audit record sample loss due to missing smoking information  
18  
19 may have introduced bias to the data and be indicative of deficient health assessment and  
20  
21 data collection procedures at the local health service level. Similarly, the use of audit  
22  
23 records creates a selection bias (e.g., not including records with chronic diseases) hence our  
24  
25 results likely under-estimate the prevalence of smoking. Limitations in the assessment of  
26  
27 community-level smoking have been noted in other studies<sup>35, 45</sup>. Potential confounding due  
28  
29 to residential self-selection toward smaller and potentially healthier communities could not  
30  
31 be accounted for. Given the small sample size and the desire to assess simple associations,  
32  
33 the common and recommended<sup>46</sup> epidemiological approach of dichotomising the data at  
34  
35 the median was utilised. We acknowledge that the categorisation of these data results in  
36  
37 some information loss. Finally, this study is ecological and associations between community  
38  
39 smoking rates and community factors should not be inferred at the individual level. The  
40  
41 environmental correlates of smoking rates stand to differ from the predictors of individual  
42  
43 smoking initiation and cessation.  
44  
45  
46  
47  
48  
49  
50  
51  
52  
53  
54  
55  
56  
57  
58  
59  
60

## CONCLUSION

This study found substantial variation in smoking rates between Australian remote Indigenous communities, and that community-level sociodemographic (relatively large population size, high education level, and high income), and climatic factors (heat and frequent heavy rain) were associated with high smoking rates. Better data are needed to more accurately assess differences in community smoking rates, the ecological factors relating to these differences, and to track change in smoking rates over time. Further assessment of climatic factors, particularly heat, in relation to smoking is warranted.

Community smoking rate is likely associated with adverse historical experiences and local pathologies. Efforts to reduce smoking rates should include a focus on improving local social conditions using a collaborative approach distinct from traditional forms of health education.

## DECLARATIONS

### Acknowledgements

The authors wish to acknowledge Veronica Matthews, Senior Research Officer, ABCD National Research Partnership for assistance in data provision. The development of this manuscript would not have been possible without the active support, enthusiasm and commitment of staff in participating primary health care services, and members of the ABCD National Research Partnership and the Centre for Research Excellence in Integrated Quality Improvement.

### Funding

This work was supported by the Australian Research Council [grant number DP120102482] and drew upon data collected as part of the *One21seventy* project. *One21seventy* is a continuous quality improvement (CQI) program developed as part of the ABCD National Research Partnership Project (both the ABCD National Research Partnership Project and the Centre for Research Excellence in Integrated Quality Improvement were funded by the National Health and Medical Research Council [GNT545267; GNT1078927 respectively] and the Lowitja Institute, and by financial and in-kind support from a range of Community Controlled and Government agencies). The Audit and Best Practice for Chronic Disease Extension (ABCDE) Project was supported by funding from the Cooperative Research Centre for Aboriginal Health and the Australian Commission on Safety and Quality in Health Care. The funding sources had no involvement with study design, data collection, analysis and interpretation of results, writing this manuscript or choice of journal.

### Competing interests

The authors declare they have no competing interests.

### Ethics approval and consent to participate

Ethics approval for the present study was obtained from the Human Research Ethics Committee (HREC) of University of South Australia [HREC Reference No. 31874], Central Australian Human Research Ethics Committee [HREC-13-182], Human Research Ethics Committee of the Northern Territory Department of Health and Menzies School of Health Research [HREC 2013-2083], and Far North Queensland Human Research Ethics Committee [HREC/15/QCH/4-946]. Ethics approvals for the ABCD National Research Partnership, for the



1  
2  
3 geographic area pertaining to this study, were obtained from HRECs in the states and  
4 territories involved: the HREC of the Northern Territory Department of Health and Menzies  
5 School of Health Research (HREC-EC00153); Central Australian HREC (HREC-12-53);  
6 Queensland HREC Darling Downs Health Services District (HREC/11/QTDD/47); and the  
7 South Australian Indigenous Health Research Ethics Committee (04-10-319). Protocols for  
8 sharing de-identified client-level data by participating health services are managed by the  
9 ABCD National Research Partnership.  
10  
11  
12  
13  
14  
15

### 16 **Consent for publication**

17  
18 Not applicable as the research presented in this manuscript is not a case study, nor does it  
19 contain any individual person's data in any form.  
20  
21  
22

### 23 **Data availability**

24  
25 Research involving Aboriginal and Torres Strait Islander peoples is strictly governed in  
26 Australia by the Australian Code for the Responsible Conduct of Research and Values and  
27 Ethics: Guidelines for Ethical Conduct in Aboriginal and Torres Strait Islander Health  
28 Research. In order to comply with these national regulations, both the legal agreements  
29 governing health service participation in the ABCD National Research Partnership and the  
30 human research ethics committee approvals of multiple jurisdictions preclude the sharing of  
31 a de-identified data set without evidence that its proposed use addresses the ethical  
32 requirements of Reciprocity, Respect, Equality, Responsibility, Survival and Protection, and  
33 Spirit and Integrity. Data requests addressing these criteria may be sent to the ABCD  
34 National Research Partnership Data Access Committee care of Professor Ross Bailie  
35 ([ross.bailie@sydney.edu.au](mailto:ross.bailie@sydney.edu.au)).  
36  
37  
38  
39  
40  
41  
42  
43  
44  
45

### 46 **Authors' contributions**

47  
48 SC prepared the data, performed analyses, interpreted results and contributed to the  
49 drafting and revision of the manuscript. MJD performed analyses, interpreted results and  
50 contributed to the drafting and revision of the manuscript. RB conceived of and designed  
51 the study and contributed to the revision of the manuscript. MD conceived of and designed  
52 the study, interpreted results and contributed to the drafting and revision of the  
53 manuscript. All authors approved the final manuscript.  
54  
55  
56  
57  
58  
59  
60

## REFERENCES

1. CDC. How tobacco smoke causes disease: the biology and behavioral basis for smoking-attributable disease: a report of the Surgeon General. Atlanta, GA: Centers for Disease Control and Prevention (US), 2010.
2. Willi C, Bodenmann P, Ghali WA, et al. Active smoking and the risk of type 2 diabetes: A systematic review and meta-analysis. *JAMA* 2007;298(22):2654-64. doi: 10.1001/jama.298.22.2654
3. Jamal A, Homa DM, O'Connor E, et al. Current cigarette smoking among adults—United States, 2005–2014. . *Morbidity and Mortality Weekly Report, Centers for Disease Control and Prevention* 2015; 64(44).  
[http://www.cdc.gov/mmwr/preview/mmwrhtml/mm6444a2.htm?s\\_cid=mm6444a2\\_w](http://www.cdc.gov/mmwr/preview/mmwrhtml/mm6444a2.htm?s_cid=mm6444a2_w) (accessed 24 August 2016).
4. Statistics Canada. Aboriginal statistics at a glance. 2nd ed. Canada: Statistics Canada, 2015.
5. Ministry of Health. Annual update of key results 2015/16: New Zealand Health Survey. In: Health Mo, ed. Wellington: Ministry of Health, 2016.
6. AIHW. Australia's health 2018. Australia's health series no. 16. ed. AIHW: Canberra, 2018.
7. Vos T, Barker B, Begg S, et al. Burden of disease and injury in Aboriginal and Torres Strait Islander Peoples: the Indigenous health gap. *International Journal of Epidemiology* 2009;38(2):470-77. doi: 10.1093/ije/dyn240
8. Briggs VL, Lindorff KJ, Ivers RG. Aboriginal and Torres Strait Islander Australians and tobacco. *Tobacco Control* 2003;12(suppl 2):ii5-ii8. doi: 10.1136/tc.12.suppl\_2.ii5
9. Thomas DP, Briggs V, Anderson IPS, et al. The social determinants of being an Indigenous non-smoker. *Australian and New Zealand Journal of Public Health* 2008;32(2):110-16. doi: 10.1111/j.1753-6405.2008.00185.x
10. Scollo M, Winstanley M. Tobacco in Australia: facts and issues. Melbourne, Australia: Cancer Council Victoria; 2017 [Available from: <http://www.TobaccoInAustralia.org.au> accessed May 30 2018].
11. Australian Health Ministers' Advisory Council. Aboriginal and Torres Strait Islander Health Performance Framework 2014 Report. Canberra: Australian Health Ministers' Advisory Council, 2015.
12. AIHW. Cardiovascular disease, diabetes and chronic kidney disease—Australian facts: Aboriginal and Torres Strait Islander people. Cardiovascular, diabetes and chronic kidney disease series Canberra, 2015.
13. Robertson JR, Stevenson L, Usher K, et al. A review of trends in Indigenous Australian tobacco research (From 2004 to 2013), its associated outputs and evidence of research translation. *Nicotine & Tobacco Research* 2015;17(8):1039-48. doi: 10.1093/ntr/ntv018
14. Ivers RG, Castro A, Parfitt D, et al. Evaluation of a multi-component community tobacco intervention in three remote Australian Aboriginal communities. *Australian and New Zealand Journal of Public Health* 2006;30(2):132-36. doi: 10.1111/j.1467-842X.2006.tb00105.x
15. Virtanen M, Kivimäki M, Kouvonen A, et al. Average household income, crime, and smoking behaviour in a local area: the Finnish 10-Town study. *Social Science & Medicine* 2007;64(9):1904-13. doi: 10.1016/j.socscimed.2007.01.005
16. van Lenthe FJ, Mackenbach JP. Neighbourhood and individual socioeconomic inequalities in smoking: the role of physical neighbourhood Stressors. *Journal of Epidemiology and Community Health* 2006;60(8):699-705.
17. Andrews JO, Mueller M, Newman SD, et al. The association of individual and neighborhood social cohesion, stressors, and crime on smoking status among African-American women in southeastern US subsidized housing neighborhoods. *Journal of Urban Health* 2014;91(6):1158-74. doi: 10.1007/s11524-014-9911-6
18. Brady M. Historical and cultural roots of tobacco use among Aboriginal and Torres Strait Islander people. *Australian and New Zealand Journal of Public Health* 2002;26(2):120-24.

19. Macknight C. The view from Marege': Australian knowledge of Makassar and the impact of the trepang industry across two centuries. *Aboriginal History* 2011;35:121-43.
20. Webb L, Bambrick H, Tait P, et al. Effect of ambient temperature on Australian Northern Territory public hospital admissions for cardiovascular disease among Indigenous and Non-Indigenous populations. *International Journal of Environmental Research and Public Health* 2014;11(2) doi: 10.3390/ijerph110201942
21. Chandra S, Chaloupka FJ. Seasonality in cigarette sales: patterns and implications for tobacco control. *Tobacco control* 2003;12(1):105-07.
22. Momperousse D, Delnevo CD, Lewis MJ. Exploring the seasonality of cigarette-smoking behaviour. *Tobacco Control* 2007;16(1):69-70.
23. Anderson CA. Temperature and aggression: ubiquitous effects of heat on occurrence of human violence. *Psychological Bulletin* 1989;106(1):74-96. doi: 10.1037/0033-2909.106.1.74
24. Anderson CA. Heat and violence. *Current Directions in Psychological Science* 2001;10(1):33-38. doi: 10.1111/1467-8721.00109
25. Choi D, Ota S, Watanuki S. Does cigarette smoking relieve stress? Evidence from the event-related potential (ERP). *International Journal of Psychophysiology* 2015;98(3):470-76. doi: 10.1016/j.ijpsycho.2015.10.005
26. Daniel M, Cargo MD, Lifshay J, et al. Cigarette smoking, mental health and social support: data from a Northwestern First Nation. *Canadian Journal of Public Health / Revue Canadienne de Sante'e Publique* 2004;95(1):45-49.
27. Menzies School of Health Research. Improving the quality of primary health care - a primary training manual for the One21seventy cycle. Darwin: Menzies School of Health Research, 2014.
28. Australian Bureau of Statistics. Australian Standard Geographical Classification (ASGC). Canberra: Australian Bureau of Statistics, 2011.
29. Australian Bureau of Statistics. Census of Population and Housing - 2011 Census Products Canberra: Australian Bureau of Statistics; 2011 [2011].
30. Department of Human Services. 2013 Australian Government Indigenous Programs & Policy Locations (AGIL). In: Australia Co, ed. Canberra: Department of Human Services, 2013.
31. Bureau of Meteorology. Climate Data Online. Canberra, Australia: Australian Government, Bureau of Meteorology 2016.
32. Australian Government Bureau of Meteorology. Annual and monthly heating and cooling degree days 2018 [Available from: <http://www.bom.gov.au/climate/map/heating-cooling-degree-days/documentation.shtml> accessed 17/12/2018 2018].
33. Stern H, de Hoedt G, Ernst J. Objective classification of Australian climates. *Australian Meteorological Magazine* 2000;49(2):87-96.
34. Berry G, Armitage P. Mid-P Confidence Intervals: A Brief Review. *Series D (The Statistician)* 1995;44(4):417-23. doi: 10.2307/2348891
35. Wright A, Lovett R, Roe Y, et al. Enhancing national data to align with policy objectives: Aboriginal and Torres Strait Islander smoking prevalence at finer geographic levels. *Australian Health Review* 2017:-. doi: 10.1071/AH16269
36. AIHW. Tobacco indicators baseline data: reporting under the National Tobacco Strategy 2012–2018. Drug statistics series. Canberra: Australian Institute of Health and Welfare, 2015.
37. AIHW. The health and welfare of Australia's Aboriginal and Torres Strait Islander peoples: 2015 Canberra: Australian Institute of Health and Welfare, 2015.
38. Homel R, Lincoln R, Herd B. Risk and resilience: crime and violence prevention in Aboriginal communities. *The Australian and New Zealand journal of Criminology* 1999;32(2):182-96.
39. Kingsley JY, Townsend M, Phillips R, et al. "If the land is healthy ... it makes the people healthy": the relationship between Caring for Country and health for the Yorta Yorta Nation, Boonwurrung and Bangerang Tribes. *Health & Place* 2009;15(1):291-99. doi: 10.1016/j.healthplace.2008.05.009

- 1  
2  
3 40. Memmot P, Stacy R, Chambers C, et al. Violence in Indigenous communities. In: Aboriginal  
4 Environments Research Centre UoQ, ed. Canberra: Commonwealth Attorney-General's  
5 Department, 2001.  
6  
7 41. Morrison K. Marx, Durkheim, Weber: formations of modern social thought. 2nd ed. London: Sage  
8 Publications Ltd 2006.  
9  
10 42. Spencer D. Anomie and demoralization in transitional cultures: the Australian Aboriginal model.  
11 *Transcultural Psychiatry* 2000;37(1):5-10.  
12  
13 43. Durkheim E. Suicide: a study in sociology. London: Routledge & Kegan 2005 [1897].  
14  
15 44. Graham H, Inskip HM, Francis B, et al. Pathways of disadvantage and smoking careers: evidence  
16 and policy implications. *Journal of Epidemiology and Community Health* 2006;60(Suppl 2):ii7-  
17 ii12. doi: 10.1136/jech.2005.045583  
18  
19 45. Butler R, Chapman S, Thomas DP, et al. Low daily smoking estimates derived from sales  
20 monitored tobacco use in six remote predominantly Aboriginal communities. *Australian &*  
21 *New Zealand Journal of Public Health* 2010;34(Suppl 1):S71-S75. doi: 10.1111/j.1753-  
22 6405.2010.00557.x.  
23  
24  
25  
26  
27  
28  
29  
30  
31  
32  
33  
34  
35  
36  
37  
38  
39  
40  
41  
42  
43  
44  
45  
46  
47  
48  
49  
50  
51  
52  
53  
54  
55  
56  
57  
58  
59  
60

STROBE Statement—Checklist of items that should be included in reports of *cross-sectional studies*

|                              | Item No | Recommendation                                                                                                                                                                                                                                                                                                                                                                                                                                                                                                                                  |
|------------------------------|---------|-------------------------------------------------------------------------------------------------------------------------------------------------------------------------------------------------------------------------------------------------------------------------------------------------------------------------------------------------------------------------------------------------------------------------------------------------------------------------------------------------------------------------------------------------|
| <b>Title and abstract</b>    | 1       | (a) Indicate the study's design with a commonly used term in the title or the abstract<br><b>The term 'Ecological' is included within the Abstract (Background)</b><br>(b) Provide in the abstract an informative and balanced summary of what was done and what was found<br><b>See Abstract Section</b>                                                                                                                                                                                                                                       |
| <b>Introduction</b>          |         |                                                                                                                                                                                                                                                                                                                                                                                                                                                                                                                                                 |
| Background/rationale         | 2       | Explain the scientific background and rationale for the investigation being reported<br><b>See particularly Introduction para 1, 4 &amp; 5</b>                                                                                                                                                                                                                                                                                                                                                                                                  |
| Objectives                   | 3       | State specific objectives, including any prespecified hypotheses<br><b>See last line of Introduction</b>                                                                                                                                                                                                                                                                                                                                                                                                                                        |
| <b>Methods</b>               |         |                                                                                                                                                                                                                                                                                                                                                                                                                                                                                                                                                 |
| Study design                 | 4       | Present key elements of study design early in the paper<br><b>Design elements are clearly outlined in the Methods section</b>                                                                                                                                                                                                                                                                                                                                                                                                                   |
| Setting                      | 5       | Describe the setting, locations, and relevant dates, including periods of recruitment, exposure, follow-up, and data collection<br><b>See Methods Para 1, also Sampling subsection para 3.</b>                                                                                                                                                                                                                                                                                                                                                  |
| Participants                 | 6       | (a) Give the eligibility criteria, and the sources and methods of selection of participants<br><b>See Sampling subsection para 1-3</b>                                                                                                                                                                                                                                                                                                                                                                                                          |
| Variables                    | 7       | Clearly define all outcomes, exposures, predictors, potential confounders, and effect modifiers. Give diagnostic criteria, if applicable<br><b>See Measures subsection</b>                                                                                                                                                                                                                                                                                                                                                                      |
| Data sources/<br>measurement | 8*      | For each variable of interest, give sources of data and details of methods of assessment (measurement). Describe comparability of assessment methods if there is more than one group<br><b>See Measures Subsection</b>                                                                                                                                                                                                                                                                                                                          |
| Bias                         | 9       | Describe any efforts to address potential sources of bias<br><b>Due to the use of secondary data and simple cross-tabulations we could not adjust models or adapt the sampling frame to address potential sources of bias. We do stratify the cross-tabulations to assess confounding and discuss potential data issues within the Discussion section.</b>                                                                                                                                                                                      |
| Study size                   | 10      | Explain how the study size was arrived at<br><b>See Sampling subsection (3<sup>rd</sup> para) and Measures subsection (1<sup>st</sup> para)</b>                                                                                                                                                                                                                                                                                                                                                                                                 |
| Quantitative variables       | 11      | Explain how quantitative variables were handled in the analyses. If applicable, describe which groupings were chosen and why<br><b>See Data preparation and Statistical Analysis subsections</b>                                                                                                                                                                                                                                                                                                                                                |
| Statistical methods          | 12      | (a) Describe all statistical methods, including those used to control for confounding<br><b>See Statistical Analysis subsection</b><br>(b) Describe any methods used to examine subgroups and interactions<br><b>See statistical analysis subsection – additional 2x2 cross-tabulations stratified by region, community and climatic variables</b><br>(c) Explain how missing data were addressed<br><b>Each cross-tabulation used only complete data</b><br>(d) If applicable, describe analytical methods taking account of sampling strategy |

1  
2  
3  
4  
5  
6  
7  
8  
9  
10  
11  
12  
13  
14  
15  
16  
17  
18  
19  
20  
21  
22  
23  
24  
25  
26  
27  
28  
29  
30  
31  
32  
33  
34  
35  
36  
37  
38  
39  
40  
41  
42  
43  
44  
45  
46  
47  
48  
49  
50  
51  
52  
53  
54  
55  
56  
57  
58  
59  
60

|                          |     |                                                                                                                                                                                                                                                                                                                                                                                                                                                                                                               |
|--------------------------|-----|---------------------------------------------------------------------------------------------------------------------------------------------------------------------------------------------------------------------------------------------------------------------------------------------------------------------------------------------------------------------------------------------------------------------------------------------------------------------------------------------------------------|
|                          |     | NA                                                                                                                                                                                                                                                                                                                                                                                                                                                                                                            |
|                          |     | (e) Describe any sensitivity analyses                                                                                                                                                                                                                                                                                                                                                                                                                                                                         |
|                          |     | NA                                                                                                                                                                                                                                                                                                                                                                                                                                                                                                            |
| <b>Results</b>           |     |                                                                                                                                                                                                                                                                                                                                                                                                                                                                                                               |
| Participants             | 13* | (a) Report numbers of individuals at each stage of study—eg numbers potentially eligible, examined for eligibility, confirmed eligible, included in the study, completing follow-up, and analysed<br><b>See Sampling subsection (3<sup>rd</sup> para) and Measures subsection (1<sup>st</sup> para), but also note the n=56 mainland communities for the Geographic Connectivity variable</b><br>(b) Give reasons for non-participation at each stage<br>NA<br>(c) Consider use of a flow diagram<br>NA       |
| Descriptive data         | 14* | (a) Give characteristics of study participants (eg demographic, clinical, social) and information on exposures and potential confounders<br><b>See Table 1 for demographics and potential confounders</b><br>(b) Indicate number of participants with missing data for each variable of interest<br><b>Numbers of audit records with missing data are clearly described. Number of communities lacking geographic connectivity information is provided in the Measures section.</b>                           |
| Outcome data             | 15* | Report numbers of outcome events or summary measures<br><b>Descriptive statistics are provided in Table 1</b>                                                                                                                                                                                                                                                                                                                                                                                                 |
| Main results             | 16  | (a) Give unadjusted estimates and, if applicable, confounder-adjusted estimates and their precision (eg, 95% confidence interval). Make clear which confounders were adjusted for and why they were included<br><b>See Table 2 and results text</b><br>(b) Report category boundaries when continuous variables were categorized<br><b>See Data preparation subsection, Methods</b><br>(c) If relevant, consider translating estimates of relative risk into absolute risk for a meaningful time period<br>NA |
| Other analyses           | 17  | Report other analyses done—eg analyses of subgroups and interactions, and sensitivity analyses<br>NA                                                                                                                                                                                                                                                                                                                                                                                                          |
| <b>Discussion</b>        |     |                                                                                                                                                                                                                                                                                                                                                                                                                                                                                                               |
| Key results              | 18  | Summarise key results with reference to study objectives<br><b>See discussion Para 1 and Conclusion</b>                                                                                                                                                                                                                                                                                                                                                                                                       |
| Limitations              | 19  | Discuss limitations of the study, taking into account sources of potential bias or imprecision. Discuss both direction and magnitude of any potential bias<br><b>See Discussion para 2 and 9</b>                                                                                                                                                                                                                                                                                                              |
| Interpretation           | 20  | Give a cautious overall interpretation of results considering objectives, limitations, multiplicity of analyses, results from similar studies, and other relevant evidence<br><b>See Discussion</b>                                                                                                                                                                                                                                                                                                           |
| Generalisability         | 21  | Discuss the generalisability (external validity) of the study results<br><b>See Discussion</b>                                                                                                                                                                                                                                                                                                                                                                                                                |
| <b>Other information</b> |     |                                                                                                                                                                                                                                                                                                                                                                                                                                                                                                               |
| Funding                  | 22  | Give the source of funding and the role of the funders for the present study and, if                                                                                                                                                                                                                                                                                                                                                                                                                          |

---

applicable, for the original study on which the present article is based

**See Funding section**

---

\*Give information separately for exposed and unexposed groups.

**Note:** An Explanation and Elaboration article discusses each checklist item and gives methodological background and published examples of transparent reporting. The STROBE checklist is best used in conjunction with this article (freely available on the Web sites of PLoS Medicine at <http://www.plosmedicine.org/>, Annals of Internal Medicine at <http://www.annals.org/>, and Epidemiology at <http://www.epidem.com/>). Information on the STROBE Initiative is available at [www.strobe-statement.org](http://www.strobe-statement.org).

For peer review only
